# Supplementary material for: A retrospective study of risk factors for early-onset neonatal sepsis with intrapartum maternal fever
Source: PeerJ. 2022 Aug 12;10:e13834. doi: 10.7717/peerj.13834 (PMC9377330; doi:10.7717/peerj.13834)
Supplement: Data S1 [file peerj-10-13834-s001.xlsx]

## Sheet: Sheet1
Maternal Number	Maternal age	Education	BMI	Parity	Gestational week	Diabetes mellitus	Hypertension	Hypothyroidism	GBS	WBC before delivery (×10*9/L)	NC before delivery (×10*9/L)	CRP before delivery (mg/L)	PT before delivery (s)	APTT before delivery (s)	WBC after delivery(×10*9/L)	NC after delivery (×10*9/L)	CRP after delivery (mg/L)	Placental pathologic	Methods of labor induction (0: natural labor;1: oxytocin;2: balloon;3: Propess TM)	Premature rupture of membranes (hour : minute)	Peak fever temperature	Epidural（0:No；1:Yes）	Mode of delivery (0: delivery; 1: side cut; 2: midwifery; 3: Cesarean section)	Amniotic fluid shape (0: clear;1: I °;2: II °;3: III °)	Phase 2( hour: minute)	Phase 3, min	Newborn birth weight	Newborn gender (0:Female; 1:Male)	1-min Apgar（0: 8-10 points；1: 4-7points；2:0-3points）	Whether to be transferred to NICU treatment (0: not transferred;1: septicemia;2: hyperbilirubinemia;3: asphyxiation;4: pneumonia;5: neonatal meconium aspiration syndrome;6: hypoglycemia;7: Ingestion syndrome)	Neonatal sepsis(0:No;1:Yes)
1	31	University graduate	25.91	1	39+	0	0	0	0	17.1	15.7	91.1	10.2	24.8	14	10.9	64.8	Acute chorioamniotic disease stage II	1	1day + 10:00:00	38.8	1	1	3	02:04:00	5	3040	0	0	1	1
2	28	University graduate	35.65	1	38+	0	0	0	0	21	18.9	72.6	10.6	28.8	17.7	14.8	115.8	Normal	0	08:14:00	38.7	1	1	1	02:29:00	6	3490	0	0	0	0
3	28	University graduate	25.91	1	41+	0	0	1	0	14.2	12.6	14.9	10.1	27.1	13.7	10.3	63.2	Normal	0	13:42:00	38.6	1	1	1	02:42:00	8	3650	1	0	0	0
4	28	University graduate	35.65	1	38+	0	0	0	0	8.5	6.5	14.9	10.8	31	8.4	6.3	37.8	Normal	0	04:43:00	38.3	1	1	0	01:33:00	2	3070	1	0	0	0
5	31	University graduate	29.17	1	39+	0	0	0	0	16.9	15.6	4.7	10.3	24.9	17.6	16.1	96	Acute chorioamniotic disease stage I	0	14:53:00	40.1	1	2	0	01:58:00	7	3580	1	1	3	0
6	25	University graduate	28.51	1	40+	0	0	0	0	8.6	7	5.2	11	24.9	16.3	14.1	160	Acute chorioamniotic disease stage I	0	11:07:00	38.4	1	2	2	04:02:00	8	3360	1	0	2	0
7	27	University graduate	29.29	1	40+	0	0	0	0	13.8	12.1	9	10.5	21.8	16.5	13.6	97	Normal	0	05:44:00	38.3	0	3	3	04:15:00	5	3600	1	0	0	0
8	25	University graduate	24.06	1	40+	0	0	0	0	6.4	5.1	5.15	10.5	28.5	9.3	7.4	23.6	Normal	1	01:35:00	38.2	1	1	0	02:50:00	10	3210	0	0	0	0
9	29	Master	27.46	1	40+	0	0	0	0	18.7	16.2	42.5	10.9	29	15.8	12.6	100	Acute chorioamniotic disease stage II	0	07:01:00	38.5	1	1	3	03:01:00	14	3180	1	1	3	0
10	24	Trade school	27.55	1	39+	0	0	0	0	8.2	6.5	5.5	11.5	34.8	10.4	8.1	36.7	Normal	0	01:02:00	38.1	1	0	2	01:02:00	8	3460	0	0	0	0
11	26	University graduate	26.26	1	39+	0	0	0	0	12.5	11.4	5.4	10.5	22.5	7	4.7	33	Acute chorioamniotic disease stage I	3	1day + 5:39:00	38.6	1	1	0	00:59:00	21	3280	0	0	0	0
12	27	University graduate	24.72	1	38+	0	0		0	11.1	10.1	13	10.2	27.6	11.5	9.3	66	Normal	0	03:25:00	38.1	1	1	1	02:21:00	5	3560	1	0	0	0
13	28	Trade school	32.04	1	41+	0	0	0	0	13	11.7	7.9	10.9	27.3	10.4	8.2	125.8	Normal	1	09:10:00	38.4	0	3	0	02:21:00	5	4100	0	0	0	0
14	27	University graduate	25.39	1	40+	0	0	0	0	9.7	7.3	4.19	10.3	26.7	14.3	11.3	69.3	Acute chorioamniotic disease stage III	3+1	22:01:00	38.3	0	1	0	02:41:00	4	3820	0	0	0	0
15	31	University graduate	26.56	1	39+	0	0	1	0	20.3	18.3	11.5	10.4	23.6	17	13.3	102.41	Normal	1	1day + 3:06:00	38.4	1	1	0	01:51:00	14	3050	1	0	0	0
16	29	University graduate	33.62	1	39+	0	0	0	0	11.7	8.9	1	10.8	29.3	13.3	10.7	48	Normal	1	23:44:00	38.1	1	3	0	02:41:00	4	3650	1	0	0	0
17	29	University graduate	23.87	1	38+	0	0	0	0	9.3	7.4	4.7	10.2	23.8	10.7	8.2	65.5	Normal	0	08:03:00	39.6	1	0	0	00:43:00	7	3820	1	0	0	0
18	30	University graduate	23.87	1	41+	0	0	1	0	17.1	8.7	35.8	11	26.3	9.9	6.7	53.1	Normal	1+2	08:46:00	38.2	1	1	0	01:51:00	9	3440	0	0	0	0
19	28	University graduate	26.22	1	38+	0	0	0	0	13.5	11.4	35.8	11.3	30.3	11.8	9.4	60.9	Normal	0	08:15:00	38.3	1	1	0	01:47:00	13	3270	1	0	0	0
20	27	University graduate	23.8	1	39+	0	0	0	0	14.9	13.1	14.4	9.9	24.9	10.4	8	54.4	Acute chorioamniotic disease stage II	0	14:20:00	38.5	1	1	0	03:20:00	25	2740	0	0	2	0
21	26	University graduate	28.95	1	40+	0	0	0	0	14.6	12.3	29.4	10.4	27.9	7.4	5.2	33.9	Acute chorioamniotic disease stage II	1	1day + 21:57:00	38.5	1	1	3	04:03:00	7	3500	1	0	1	1
22	27	University graduate	24.24	1	40+	0	0	0	0	18.4	17	45.29	9.9	33.3	14.2	11.9	86.33	Normal	0	06:12:00	39.1	1	1	0	01:17:00	3	3380	1	0	0	0
23	30	University graduate	25.15	1	39+	0	0	0	0	12.8	11.2	45.29	10.5	24.7	13.3	10.7	66.1	Acute chorioamniotic disease stage I	0	23:11:00	38.8	1	1	0	03:11:00	4	2980	0	0	4	0
24	28	University graduate	31.03	1	39+	0	1	0	0	18	15.8	19.34	9.6	27.2	12.6	9.6	31.42	Normal	1+2	1day + 5:23:00	38.6	1	1	0	01:34:00	7	3750	1	0	0	0
25	30	University graduate	27.36	1	39+	0	0	0	0	18.7	16.1	16.04	11.2	25.8	17.2	14.3	120.43	Acute chorioamniotic disease stage I	0	06:38:00	39.4	1	2	0	02:13:00	7	3300	1	1	3	0
26	25	Trade school	28.08	1	40+	0	0	0	0	13	11.2	10.7	9.9	26.3	13.6	11.3	80.57	Normal	1	03:18:00	38	1	1	3	00:36:00	7	3820	1	0	5	0
27	27	University graduate	29.27	1	39+	1	0	1	0	16.9	14.7	19.44	10.1	23.7	12.4	9.4	94.52	Acute chorioamniotic disease stage I	1+3	22:30:00	39	1	0	0	00:57:00	3	3580	1	0	0	0
28	30	University graduate	27.91	1	39+	0	0	0	0	8	5.7	5.14	9.1	23.3	10.1	7.7	50.79	Normal	1	19:10:00	38.1	0	1	0	02:35:00	5	3300	0	0	0	0
29	34	University graduate	30.67	1	39+	0	0	0	0	14	13.2	43.47	10.1	27.5	13.8	11.4	119.34	Normal	1	06:21:00	38.5	1	0	3	00:41:00	9	3780	0	0	0	0
30	32	Master	26.22	1	40+	0	0	0	0	19.7	18.3	10.47	10.1	25.5	21	18.3	52.16	Normal	0	15:30:00	38.8	1	1	0	01:00:00	10	3810	1	0	1	1
31	25	University graduate	29.55	1	40+	0	0	0	0	16.2	13.5	3.55	10.2	24	8.8	6.4	93.85	Normal	3	16:30:00	38.9	0	3	0	00:41:00	9	3900	1	1	3	0
32	28	University graduate	26.03	1	35+	0	0	1	0	21.2	19.1	84.12	10.4	27.5	14	11.9	150.66	Normal	0	1day + 5:40:00	38.2	1	3	0	01:00:00	10	2550	0	0	2	0
33	23	University graduate	33.98	1	39+	0	0	0	0	14.6	13.2	26.81	11	24.6	9.8	8	156.64	Normal	0	16:40:00	39	1	0	0	01:40:00	10	3680	0	0	0	0
34	29	University graduate	28.51	1	39+	0	0	0	0	16.5	14.8	39.17	11	26.3	13	11.5	98.05	Normal	0	06:39:00	38.5	0	2	0	00:59:00	18	2780	0	0	1	1
35	28	University graduate	27.01	1	40+	0	0	0	0	9.8	8.1	6.18	10.8	27.7	14.6	12.3	85.98	Normal	0	14:07:00	39	1	1	3	01:47:00	3	4360	1	0	1	1
36	27	University graduate	25.46	1	39+	0	0	1	0	8.5	6.3	1.54	9.9	26.6	7.7	5.8	26.09	Normal	0	05:15:00	38.1	1	2	0	02:35:00	10	3790	0	0	2	0
37	25	University graduate	23.73	1	39+	0	0	0	0	11.4	9.7	9.3	10.3	30.2	9.9	8	119	Acute chorioamniotic disease stage I	0	08:44:00	39.2	1	3	0	01:51:00	14	3350	1	0	1	1
38	27	University graduate	23.73	1	38+	0	0	0	0	13.8	11.8	8.3	10.2	27.3	15.5	12.3	44.12	Normal	0	04:39:00	38.8	1	1	0	02:09:00	8	2960	1	0	4	0
39	28	University graduate	26.74	1	39+	0	0	0	0	60	4.1	5.14	10.1	23	10.7	8	43.94	Normal	0	07:58:00	38.1	0	1	0	01:02:00	7	4130	1	0	0	0
40	29	University graduate	23.87	1	40+	0	0	1	0	9.3	7.9	30.62	10.8	32.8	12.6	10.2	44.41	Normal	0	01:41:00	38.3	1	1	1	01:41:00	2	3680	1	0	0	0
41	28	University graduate	23.63	1	39+	0	0	0	0	7.5	5.4	4	10.6	26.6	12.4	9.5	101.57	Normal	1	00:33:00	38.5	1	0	0	00:33:00	7	3530	1	0	0	0
42	37	Trade school	29.62	2	39+	0	0	1	0	8.5	6.6	11.26	10.2	24.1	7.8	5.3	31.64	Normal	3	01:29:00	38	0	0	0	00:09:00	6	3450	1	0	0	0
43	27	University graduate	28.76	1	38+	0	0	0	0	14.4	12.9	2.74	9.9	26	12.2	9.7	20.82	Normal	0	04:02:00	38.9	1	0	0	01:42:00	8	3310	1	0	1	1
44	29	University graduate	27.38	1	41+	0	0	0	0	12.9	10.8	15.94	9.8	25.1	9.1	6.7	105.18	Normal	0	14:41:00	38.7	1	1	0	01:53:00	7	4120	0	0	0	0
45	30	Trade school	27.67	3	38+	0	0	0	0	13.3	11.2	20.94	11.7	31.5	12.1	10	55.91	Acute chorioamniotic disease stage II	0	22:11:00	39	0	0	3	00:06:00	9	3100	0	0	0	0
46	32	University graduate	27.05	1	39+	0	0	0	0	15.6	14.3	23.89	11.4	27.4	12.1	10	55.91	Normal	1	1day + 5:14:00	38.5	1	1	3	02:34:00	6	3820	1	0	0	0
47	23	Trade school	28.04	1	39+	0	0	0	0	8.4	6.7	4.82	11.5	23.7	11.7	10	184.39	Acute chorioamniotic disease stage I	0	17:13:00	38.3	1	3	3	02:35:00	10	2800	0	0	0	0
48	25	University graduate	25	1	38+	0	0	0	0	17.7	16.3	26.69	11	26.4	12.3	9.7	61.32	Normal	0	03:53:00	38.4	1	0	0	00:38:00	7	3520	0	0	0	0
49	29	University graduate	19.26	1	40+	0	0	0	0	6.5	4	2.71	10.3	27.3	10.3	7	22.36	Normal	1+2	14:35:00	38	1	1	0	01:30:00	5	3460	0	0	2	0
50	29	Master	26.15	1	39+	0	0	0	0	9.3	6.9	2.71	9.1	26.3	10.3	7	22.36	Acute chorioamniotic disease stage II	0	14:56:00	38.7	0	0	0	01:06:00	9	3260	0	0	0	0
51	34	Master	24.84	1	39+	0	0	0	0	14.5	13.2	57.02	10.1	27.1	10.2	8.2	88.27	Normal	1	1day + 22:35:00	38.5	1	0	0	02:35:00	15	3300	1	0	1+2	1
52	29	University graduate	25.69	1	41+	0	0	0	0	4.7	2.9	0.89	10.8	28.3	10.1	8	138.76	Normal	3	1day + 0:02:00	38.4	1	3	0	02:35:00	15	3800	0	0	0	0
53	25	Trade school	28.56	1	40+	0	0	0	0	9.1	7.2	2.59	10.1	20.3	11.1	7.6	16.29	Normal	0	03:28:00	38.2	0	0	2	00:28:00	7	3030	0	0	0	0
54	27	University graduate	26.91	1	39+	0	0	0	0	8	5.8	2.86	9.7	24.4	11.2	8.1	49.38	Normal	0	04:28:00	38.2	0	0	0	00:38:00	7	2900	0	0	0	0
55	28	University graduate	28.24	1	38+	0	0	0	0	8	5.8	2.86	9.7	24.4	18.3	14.9	61.11	Normal	0	07:48:00	38.6	1	0	0	02:18:00	7	2660	1	0	0	0
56	27	University graduate	28.2	1	39+	0	0	1	0	15.6	14.4	20.66	10.6	26.8	10.8	9.1	152.25	Acute chorioamniotic disease stage I	1	1day + 17:50:00	38.7	1	3	3	00:38:00	7	3050	1	0	0	0
57	32	University graduate	25.07	1	39+	1	0	0	0	18.3	16.5	111	9.5	23.8	10.8	9.1	152.25	Acute chorioamniotic disease stage III	0	1day + 7:39:00	38.3	1	3	3	02:18:00	7	3100	1	0	1	1
58	27	University graduate	38.2	1	39+	0	1	0	0	17.8	16.2	13.15	10.1	25.3	10.6	8.8	158.99	Normal	2+1	19:22:00	38.6	0	3	0	02:18:00	7	3800	0	0	2	0
59	24	Trade school	25.07	1	39+	0	0	0	0	16.3	12.9	11	10.9	27.4	12.7	9.7	67.2	Acute chorioamniotic disease stage I	0	05:10:00	39	1	2	3	00:50:00	5	3550	1	0	0	0
60	27	Master	25.14	1	40+	0	0	0	0	11.4	9.8	20.3	11.5	30.4	8.7	6.4	24.8	Normal	0	04:03:00	38.4	0	0	0	00:50:00	5	3540	0	0	0	0
61	30	University graduate	29.24	1	41+	0	0	0	0	16.9	15.3	11	10.7	25.9	9.7	7.2	46	Normal	1	19:41:00	38.6	1	1	0	00:41:00	9	3400	1	0	0	0
62	33	University graduate	28.06	2	38+	1	0	0	0	11.7	10.3	25.3	10.5	26.4	13.5	10.8	49.1	Normal	0	00:16:00	38.2	0	0	0	00:16:00	9	3100	0	0	0	0
63	27	University graduate	27.39	1	38+	0	0	0	0	18.3	16.3	9.2	10.1	24.6	16.3	12	113.4	Normal	2	04:30:00	38.8	1	0	0	01:45:00	10	3230	1	0	0	0
64	23	Trade school	33.59	1	39+	1	0	0	0	16.9	15.3	11	10.7	25.9	12.3	9.7	73.1	Normal	2	1day + 0:01:00	38.1	1	0	0	00:17:00	14	3230	0	0	2	0
65	27	University graduate	27.91	1	40+	0	1	0	0	11.7	10.3	25.3	10.5	26.4	16.3	12	113.4	Acute chorioamniotic disease stage I	2	13:11:00	39	1	2	3	00:41:00	14	3620	1	0	0	0
66	28	University graduate	28.84	1	37+	0	0	0	0	18.3	16.3	9.2	10.1	24.6	12.3	9.7	73.1	Normal	0	00:49:00	38.5	1	0	0	00:49:00	9	3410	1	0	1	1
67	28	University graduate	24.25	1	39+	0	0	0	0	12.3	11.2	34.16	10.2	26.7	14.8	12.3	97.39	Normal	3	22:20:00	38.6	1	1	3	01:32:00	10	3300	0	0	0	0
68	30	University graduate	26.17	1	39+	0	0	0	0	24	22.3	3.84	11.6	21.9	15.2	12	90.72	Normal	1	15:57:00	38.5	0	3	0	01:32:00	10	3250	0	0	0	0
69	24	University graduate	26.43	1	38+	0	0	0	1	6.6	5	6.83	11.4	32.7	15.9	13.5	27.13	Normal	1	1day + 10:55:00	38.1	0	1	0	00:30:00	5	3550	0	0	0	0
70	27	University graduate	31.61	1	39+	0	0	0	0	23.1	21.9	8.63	10.2	29	22.4	19.5	159.69	Acute chorioamniotic disease stage I	0	10:13:00	39	1	3	0	01:32:00	10	3750	0	0	1	1
71	29	University graduate	27.05	1	40+	1	0	1	0	8.9	7.2	9.89	10.1	25	9.3	7.5	143.26	Normal	1	04:42:00	38.5	1	3	3	00:30:00	5	3400	0	0	0	0
72	31	University graduate	28.12	1	38+	0	0	0	0	20	17.2	29.95	10.6	28.8	16.8	14.2	106	Normal	0	03:40:00	38.7	1	1	0	02:20:00	25	3470	0	0	1	1
73	28	Master	23.3	1	35+	0	1	0	1	13.9	12.6	14.99	9.3	22.5	13.7	11.3	60.17	Normal	0	02:01:00	38.7	0	1	0	00:51:00	9	2100	1	0	1	1
74	33	University graduate	30.79	1	41+	0	0	0	0	17.5	15.7	43.39	9.5	23.8	15.9	12.2	87.62	Normal	2	16:47:00	39.2	1	1	1	01:37:00	8	3610	0	0	2	0
75	31	Master	23.62	2	38+	0	0	0	0	7.2	5.3	0.69	11.3	30.1	13.8	11.6	20.53	Acute chorioamniotic disease stage III	0	17:00:00	38.5	0	0	0	00:10:00	5	3230	0	0	4	1
76	26	Trade school	22.69	1	40+	0	0	0	0	8.3	6.3	3.47	10.2	24	12.3	9.9	51.36	Normal	0	03:57:00	38.2	1	0	2	01:57:00	8	3290	0	0	0	0
77	29	University graduate	24.97	1	40+	0	0	1	0	14.1	12.1	48.9	10.8	33.5	11	8.4	136.6	Acute chorioamniotic disease stage IV	0	09:52:00	39.5	1	2	2	01:47:00	8	3590	1	0	1	1
78	27	Trade school	30.88	1	40+	1	0	0	0	17.6	16	47.2	10.1	27.7	15.7	12.8	160	Acute chorioamniotic disease stage III	2+1	22:47:00	39.3	1	3	0	01:47:00	8	3650	1	0	0	0
79	26	University graduate	27.36	1	39+	0	0	0	0	15.5	13.9	10.4	11.1	26.3	15.4	13	65.7	Normal	2+1	01:19:00	38.9	1	0	0	01:29:00	16	3280	0	0	0	0
80	27	University graduate	27.36	1	39+	0	0	1	0	7.7	5.6	2.4	9.9	25.2	10.5	7.8	33.6	Normal	0	04:26:00	38.3	1	0	3	01:26:00	4	3710	0	0	2	0
81	28	University graduate	27.63	1	40+	0	0	0	0	19	15.8	19.2	9.9	23.5	21.9	15.2	75.6	Acute chorioamniotic disease stage III	0	10:51:00	38.5	0	1	3	01:36:00	9	3320	0	0	0	0
82	26	University graduate	30.01	1	40+	1	0	0	0	20.6	18.9	59.1	11.1	27.7	20.9	18.7	107.3	Acute chorioamniotic disease stage II	2+1	1day + 7:18:00	39	0	3	0	01:36:00	9	3600	0	0	1	1
83	28	University graduate	30.03	1	40+	0	0	0	0	10.7	8.9	11.6	9.7	27.8	10.5	8.3	92	Normal	2+1	04:18:00	38.4	1	1	0	01:53:00	7	3360	1	0	0	0
84	26	University graduate	31.26	1	39+	0	0	0	0	16.1	14.2	4.1	10.4	26.4	17.5	15.1	50.5	Normal	1	03:01:00	38.9	1	1	0	03:31:00	23	4020	0	0	0	0
85	28	University graduate	29.21	1	41+	0	0	1	0	8.9	7.4	25.7	11.6	31.6	10.1	8.5	160	Normal	1	01:19:00	38.7	0	3	2	03:31:00	23	3950	0	0	0	0
86	27	University graduate	28.5	1	39+	0	1	0	0	8.7	6.3	3.85	11.5	27.1	12.8	9.9	79	Normal	0	11:18:00	38.2	1	2	0	00:38:00	2	3190	0	0	0	0
87	29	University graduate	28.6	1	38+	0	0	0	0	16.4	14.6	18.43	10.9	27.5	9.4	7.6	150.03	Acute chorioamniotic disease stage I	1+2+3	15:00:00	38.5	0	3	0	00:38:00	2	3250	1	0	1	1
88	28	University graduate	26.89	1	39+	0	0	0	0	10.4	8.4	9.45	10.5	27	11.8	9.6	79.1	Normal	0	09:45:00	38.3	1	1	2	03:25:00	10	4000	0	0	0	0
89	22	University graduate	27.68	1	41+	0	0	0	0	15	13.2	38.4	10.2	20.4	11.5	9.1	73.15	Acute chorioamniotic disease stage III	3+1	05:37:00	39.1	1	1	3	01:58:00	7	3300	0	0	0	0
90	27	Master	27.21	1	39+	0	0	1	0	15	13.2	38.4	10.2	20.4	11.5	9.1	73.15	Acute chorioamniotic disease stage I	0	1day + 6:58:00	39.6	1	1	0	01:30:00	7	3340	0	0	0	0
91	28	Master	23.43	1	38+	0	0	0	0	10.3	7.9	5	9.6	28.2	15.6	13.2	75.7	Normal	0	01:22:00	38.7	1	2	3	00:24:00	6	2960	1	0	0	0
92	30	University graduate	28.08	1	40+	0	0	1	0	19.1	17	12.39	10.5	26.9	15.8	12.1	98.32	Normal	1	1day + 1:56:00	38.3	1	2	3	02:56:00	9	3600	1	0	0	0
93	27	University graduate	25	1	41+	0	0	0	0	15.2	12.8	13.29	10.8	29.5	18.6	15.3	60.24	Acute chorioamniotic disease stage I	2+1	04:52:00	39.3	1	1	0	01:47:00	8	3270	0	0	2	0
94	25	Trade school	26.1	1	40+	0	0	1	0	19.6	18.4	5.29	10.6	23.1	13.2	11.3	101.72	Normal	1	08:10:00	39.1	0	1	0	01:00:00	5	3840	1	0	2	0
95	31	University graduate	33.64	1	39+	0	1	1	0	16.9	14.5	5.55	10.8	23.3	10.9	8.7	80.15	Normal	0	02:31:00	38.9	1	1	0	00:53:00	14	3260	0	0	0	0
96	28	University graduate	28.63	1	39+	0	0	0	0	11.3	9.9	49.87	10.5	26.9	10.8	8.7	80.15	Normal	0	07:42:00	40.1	1	3	3	00:53:00	14	3750	0	0	1	1
97	22	University graduate	30.44	1	39+	0	0	1	0	11.5	10	8.04	10.2	25.3	12.5	10.7	160	Acute chorioamniotic disease stage I	0	05:10:00	39	1	3	3	00:10:00	5	3700	0	0	0	0
98	28	University graduate	28.66	1	40+	0	0	0	0	17.7	16.2	12.52	10.1	24.7	13.9	12.5	151.05	Normal	3	09:37:00	38.4	1	3	2	01:57:00	8	3150	1	0	0	0
99	32	University graduate	24.8	1	39+	1	0	0	0	18.6	16.3	78.83	10.3	22.2	9.1	6.5	90.43	Acute chorioamniotic disease stage II	1	15:56:00	38.4	1	1	3	02:31:00	4	3250	0	0	0	0
100	30	University graduate	24.6	1	37+	0	0	0	0	16.5	15	4.95	11	26.7	9.8	7.8	39.45	Normal	0	03:27:00	38.1	0	1	3	01:02:00	8	3370	0	0	2	0
101	28	University graduate	28.3	1	39+	0	0	0	0	9.7	7.7	7.79	11	26.3	23	20.5	72.6	Normal	3+1	16:07:00	38.2	1	1	1	01:57:00	13	3400	1	0	2	0
102	31	University graduate	25.97	1	40+	0	0	0	0	17.3	15.8	10.19	10.9	23.2	11.9	8.7	36	Normal	0	09:02:00	38.5	0	1	0	03:02:00	3	3440	0	0	1	1
103	28	Master	26.49	1	38+	0	0	0	0	18.7	17.2	11.15	10.8	27.3	15.9	14.1	89.75	Normal	2+1	09:57:00	39.1	0	3	0	01:57:00	13	3550	0	0	4	0
104	27	University graduate	30	1	41+	0	0	0	0	12.8	11.5	9.08	10.1	25.8	18.8	17.8	160	Acute chorioamniotic disease stage I	2+1	10:10:00	39.5	0	3	0	03:02:00	3	3900	1	0	0	0
105	30	University graduate	25.27	2	38+	0	0	0	0	10	7.5	2.86	10.7	26.4	9.8	7	11.14	Normal	0	00:07:00	38.2	0	0	0	00:07:00	8	2790	0	0	0	0
106	27	University graduate	30.04	1	40+	0	0	0	0	15.8	13.4	14	9.8	27	13.8	10.8	118.02	Normal	0	1day + 4:46:00	38.7	1	3	0	03:02:00	3	3550	0	0	0	0
107	24	University graduate	24.84	1	39+	0	0	0	0	14.3	11.9	43.35	12.4	25.6	11.4	8.3	38	Normal	0	03:50:00	38.5	1	0	0	00:45:00	5	3340	1	0	0	0
108	30	University graduate	33.16	1	39+	0	0	0	0	16.3	13.7	6.62	10.4	24	14.9	11.2	34.96	Normal	0	08:22:00	38.6	1	0	3	01:12:00	8	3260	0	0	0	0
109	26	University graduate	32.4	1	41+	0	0	0	0	13.2	10.9	2.13	9.8	25.6	12.8	10.2	55.42	Normal	3	02:56:00	38.1	0	0	2	01:46:00	9	3620	0	0	0	0
110	28	University graduate	28.44	1	38+	1	0	0	0	16.6	14.7	28.01	9.8	24.4	13	10.4	35.17	Normal	0	14:58:00	38.5	1	1	0	01:43:00	7	3610	1	0	0	0
111	26	University graduate	30.84	1	38+	0	0	0	0	8.8	7.2	23.24	10.1	25	7.3	5.8	51.31	Normal	0	04:26:00	38.2	0	1	3	01:23:00	2	3580	0	0	0	0
112	28	University graduate	30.84	1	37+	0	0	0	0	8.3	5.1	2.59	10.7	25.9	9.2	6.1	37.99	Normal	1	2days + 3:31:00	38.3	1	1	0	03:33:00	2	3050	0	0	2	0
113	29	University graduate	27.55	1	41+	0	0	0	0	15.8	14.4	63.98	10.6	25.4	12.6	10.8	166.55	Acute chorioamniotic disease stage II	2+1	15:28:00	38.6	1	3	3	03:33:00	2	3400	0	0	0	0
114	29	University graduate	26.32	1	38+	0	1	0	0	8.7	7.2	1.09	10.4	25.8	8.4	6.4	16.54	Normal	0	00:24:00	38.1	0	0	0	00:44:00	16	3470	0	0	0	0
115	30	University graduate	28.9	1	39+	0	0	0	0	13.9	12	8.4	10.4	27.7	12.9	9.8	62.56	Normal	0	14:27:00	38.6	1	1	0	03:18:00	2	3700	1	0	0	0
116	29	University graduate	27.81	1	38+	0	0	0	0	6.8	4.6	1.93	9.7	25.4	8.2	5.5	54.92	Normal	0	05:20:00	38.9	1	1	0	01:34:00	5	3360	1	0	0	0
117	28	University graduate	25.63	1	38+	1	0	1	0	10.1	7.5	4.76	9.5	25.2	12.9	10	35.9	Normal	0	07:27:00	38.4	1	1	1	02:02:00	23	2760	0	0	2	0
118	30	University graduate	27.94	1	39+	1	0	0	0	7.8	5.9	4	11.2	24.7	9.7	6.7	52.7	Normal	0	01:23:00	38.1	1	1	0	01:23:00	18	3270	1	0	0	0
119	26	University graduate	27.85	1	40+	1	0	0	0	11.1	9.4	33.9	11	29.7	7.9	5.6	47.4	Normal	3	12:55:00	38.3	1	1	0	02:02:00	23	3270	1	0	0	0
120	36	University graduate	27.7	1	40+	0	0	0	0	15.9	14.9	6.8	11.4	25.3	16.4	14.4	104.3	Normal	1	1day + 12:22:00	38.2	0	3	0	01:23:00	18	4000	0	0	0	0
121	25	University graduate	23.18	1	39+	0	0	1	0	10.1	7.7	1.5	9.9	21.3	15	12	32	Normal	1	15:44:00	38.1	0	0	0	01:59:00	16	3130	1	0	0	0
122	34	University graduate	25.89	1	39+	0	0	0	0	11.1	8.8	3.5	10.5	27	11.7	9.4	70.42	Normal	2+1	16:56:00	38.4	1	1	0	01:56:00	4	3450	1	1	3	0
123	26	University graduate	26.35	1	39+	0	1	0	0	22.6	21.4	55.7	10.6	26.7	12.3	9.6	108.65	Acute chorioamniotic disease stage I	0	00:18:00	38.5	1	0	3	01:08:00	2	3140	1	0	0	0
124	30	University graduate	27.34	1	40+	1	0	0	0	4.9	3.5	2.25	10.6	24.9	8	5.8	67.17	Normal	2+1	15:04:00	38.3	1	3	2	01:23:00	18	3700	0	0	2	0
125	29	University graduate	25.95	1	40+	0	0	0	0	14.3	12.2	20.19	10.8	31.5	9.9	7.6	82	Normal	1	09:29:00	38.6	1	3	0	01:59:00	16	3850	0	0	0	0
126	30	University graduate	36.71	1	41+	0	0	1	0	11.1	8.7	5.67	10.7	23	17.2	14.2	161.89	Normal		11:15:00	38.2	1	3	3	01:56:00	4	4150	0	0	0	0
127	26	University graduate	25.63	1	39+	0	0	0	0	7.1	5.2	18.76	12.1	31.9	14.1	11.6	160	Acute chorioamniotic disease stage I	1	2days + 20:10:00	38.5	1	3	3	00:07:00	8	3900	1	0	1	1
128	28	University graduate	28.28	1	39+	0	0	0	0	13	11.2	9.08	10.5	25.6	15.8	12.3	106.69	Acute chorioamniotic disease stage I	0	02:59:00	38.8	0	2	3	00:34:00	6	2980	1	0	0	0
129	30	University graduate	28	1	40+	1	0	0	0	18.1	16.2	77.5	9.8	25.2	10.7	8.5	137.1	Acute chorioamniotic disease stage I	2+1	1day + 8:08:00	38.7	1	3	0	00:07:00	8	3250	0	0	1	1
130	29	University graduate	29.01	1	40+	0	0	0	0	16	13.7	10.5	11.2	31.3	14.7	12.2	59.2	Acute chorioamniotic disease stage III	0	20:30:00	38.1	1	3	3	00:34:00	6	4150	0	0	0	0
131	29	University graduate	24.6	1	40+	0	0	0	0	12.1	10.4	33.8	12	27.4	11.6	9.6	88.9	Normal	0	08:40:00	38.7	1	1	3	04:25:00	5	3620	1	0	0	0
132	21	Trade school	32.02	1	39+	0	0	0	0	7.1	5.4	4	10.9	25	11.6	9.8	21.4	Normal	0	01:58:00	38.2	0	1	3	01:23:00	7	3260	0	0	0	0
133	31	Trade school	24.76	1	40+	1	0	0	0	14.7	12.5	33.8	10.1	22.8	14.9	11.8	116.5	Acute chorioamniotic disease stage II	1	02:58:00	39	0	3	3	01:23:00	7	3450	1	0	0	0
134	30	University graduate	24.76	1	39+	0	0	0	0	13.5	11.1	9.3	10.7	20.2	15.1	11.9	65.1	Normal	0	07:53:00	39.2	1	1	0	02:23:00	7	3200	1	0	0	0
135	23	University graduate	27.3	1	40+	0	0	0	0	13.4	11.8	10.6	10.8	25.8	9.2	6.6	37.2	Normal	0	07:18:00	39.4	1	1	0	01:43:00	7	3350	0	0	0	0
136	26	University graduate	27.3	1	41+	0	0	0	0	18.2	16.3	82.8	10.1	26.7	16.6	14.3	128.6	Acute chorioamniotic disease stage III	3	1day + 3:40:00	38.6	1	3	0	01:43:00	7	3580	0	0	1	1
137	25	University graduate	30.02	1	40+	0	0	0	0	14.2	12.6	2.5	10.4	26.5	12.8	10.9	118.42	Normal	0	04:28:00	38.5	1	3	2	01:08:00	2	3800	0	0	0	0
138	26	University graduate	25.93	1	41+	0	0	0	0	9	7.1	3.1	9.8	23.7	9.7	7.6	64	Normal	3	00:15:00	38.8	1	0	0	01:05:00	10	3580	0	0	0	0
139	32	University graduate	25.54	1	40+	0	0	1	0	4.9	3.6	7.15	9.9	28.5	12.6	10.5	80.82	Normal	0	06:50:00	38.5	1	1	3	03:00:00	20	3100	0	0	1	1
140	27	University graduate	24.95	1	38+	1	0	0	0	9.3	7.5	3.43	11	29.1	13.7	12.1	59.2	Normal	3+1	00:53:00	38.1	1	1	0	02:13:00	17	2370	0	0	0	0
141	28	University graduate	27.34	1	40+	0	0	0	0	10.1	7.7	3.54	9.9	23.5	17.5	14.3	83.14	Normal	1	06:42:00	38.3	1	0	0	01:52:00	8	3700	1	0	0	0
142	30	University graduate	27.1	1	40+	1	0	0	0	8.1	5.7	0.85	9.9	22.3	8.9	7	51	Normal	2+1	14:30:00	38.4	1	0	0	01:15:00	5	3570	1	0	0	0
143	25	University graduate	23.79	1	40+	0	0	0	0	7.1	5.3	2.74	10.6	28.2	12.7	10.5	47.15	Normal	3	07:08:00	38.4	1	0	0	00:28:00	7	3000	0	0	0	0
144	32	University graduate	16.37	1	40+	0	0	0	0	13.4	11.4	2.91	9.9	23.7	12.2	9.3	47.72	Normal	1	00:39:00	38.4	1	0	1	00:39:00	11	3170	0	0	0	0
145	28	University graduate	26.29	1	38+	0	0	0	0	9.3	6.7	5.83	9.9	25.3	16.1	13.4	70.44	Normal	0	03:11:00	38.4	1	3	3	00:28:00	7	3600	0	0	0	0
146	29	Trade school	27.28	1	39+	0	0	0	0	16	13.8	14.2	10.5	24.8	16.3	14.5	160	Normal	0	13:05:00	38	1	3	0	00:39:00	11	3500	0	0	0	0
147	32	University graduate	25.4	2	40+	0	0	0	0	6.6	4.1	2.83	10.7	24.7	7.8	4.4	9.84	Normal	1	16:09:00	38.2	0	0	0	00:09:00	6	3420	1	0	0	0
148	29	University graduate	26.61	1	40+	0	0	0	0	18.5	17.2	30.83	9.5	24	17.8	15.3	82.26	Acute chorioamniotic disease stage I	3+1	11:24:00	39.7	1	1	0	01:04:00	11	3080	0	0	0	0
149	28	University graduate	25.8	1	40+	0	0	0	0	21.7	18.9	12.91	9.9	25.3	16.7	13.2	64.93	Normal	0	02:59:00	38.4	1	1	2	01:24:00	6	3790	1	0	0	0
150	29	University graduate	26.07	1	38+	0	0	0	0	16.4	13.5	16.48	10.5	25.3	13.7	10.6	29.69	Normal	3	1day + 11:46:00	38.7	0	0	0	00:46:00	9	3750	0	0	0	0
151	30	University graduate	24.78	1	38+	0	0	0	0	10.5	8.7	0.58	10.2	24.7	13.7	10.9	53.58	Normal	0	02:18:00	38.1	0	0	0	01:13:00	17	3140	1	0	0	0
152	26	University graduate	25.59	1	40+	0	0	0	0	13.5	11.4	7.74	11.2	26.3	16.7	13.9	75.97	Normal	0	02:39:00	38	1	1	0	02:39:00	16	2920	1	0	0	0
153	27	University graduate	20.82	1	39+	0	0	0	0	9.4	8.1	2.64	9.9	22.5	7.6	6.7	21.01	Normal	0	02:10:00	38.3	0	0	0	01:50:00	10	3635	1	0	2	0
154	28	University graduate	21.82	1	40+	0	0	0	0	5.8	4	1.32	9.3	23	13	8.7	15.21	Normal	0	01:22:00	38.1	0	0	0	01:02:00	8	3440	1	0	0	0
155	26	University graduate	27.58	1	40+	0	0	1	0	10.2	7.7	24.43	9.9	31.4	10.7	8.9	52.77	Normal	0	03:38:00	38.2	1	0	0	01:13:00	7	3120	1	0	0	0
156	33	University graduate	26.1	1	39+	0	0	0	0	5.2	3.5	28.79	10.6	27.2	12.9	8.6	76.85	Normal	1	02:32:00	38.1	1	0	0	01:02:00	13	3300	1	0	0	0
157	27	University graduate	28.06	1	39+	0	0	0	0	9.2	6.5	6.6	9.9	27.3	13.5	9.7	41.6	Normal	1	04:56:00	38.2	1	1	0	00:53:00	7	3620	1	0	0	0
158	28	University graduate	27.63	1	40+	0	0	0	0	23.7	21.7	40.3	10.7	29.2	24.4	21.6	104	Acute chorioamniotic disease stage II	0	12:22:00	39.1	0	0	0	01:37:00	13	3900	1	0	1	1
159	26	University graduate	6	1	40+	0	0	0	0	12.7	10.8	13.5	9.9	23.5	11.2	8.6	84.3	Normal	0	05:55:00	38.8	1	1	0	01:35:00	5	3620	1	0	1	1
160	28	Master	27.91	1	40+	0	0	1	0	5.1	3.5	2.36	10.3	25	8.8	6.3	88.8	Normal	0	10:51:00	38.8	1	1	0	03:21:00	9	3420	1	0	0	0
161	33	University graduate	25.97	1	39+	0	0	0	0	11.2	9.2	42.8	9.8	23.5	14.2	11.4	42.8	Normal	0	1day + 2:26:00	38.3	1	1	2	02:49:00	9	3420	1	0	0	0
162	30	University graduate	26.6	1	38+	0	0	0	0	10	7.6	5.4	10.7	29.1	12.6	9.3	29.34	Normal	1	02:02:00	38.4	1	1	0	00:32:00	3	3520	1	0	0	0
163	35	Trade school	26.05	1	40+	0	0	0	0	15.2	14.1	24.2	9.8	27.5	11.6	10.3	125	Acute chorioamniotic disease stage I	1	06:15:00	38.8	1	3（宫内感染）	0	00:32:00	3	3450	1	0	0	0
164	36	University graduate	27.76	1	40+	0	0	0	0	14.3	11.5	17	10.8	29.3	15.7	11.9	63.25	Acute chorioamniotic disease stage I	2+1	1day + 19:36:00	38.3	1	2	3	03:56:00	9	4120	1	0	1	1
165	32	University graduate	24.38	1	38+	0	0	0	0	7.3	5	13.18	10.2	26.6	9.1	6.6	91.54	Normal	0	05:45:00	38.2	1	0	0	01:10:00	15	2640	1	0	0	0
166	29	University graduate	26.1	1	39+	0	0	0	0	11.9	10.6	4.35	9.9	22.6	9.3	7.4	57.77	Normal	0	15:36:00	39.3	1	1	0	01:56:00	4	4310	1	0	0	0
167	29	Master	22.88	1	40+	1	0	0	0	7.3	5	0.82	10.2	21.5	14.3	11.6	37.18	Normal	0	06:56:00	38.3	1	0	0	01:36:00	4	3290	0	0	0	0
168	29	University graduate	27.05	1	39+	0	0	0	0	11.7	9.4	2.2	9.6	24.8	18.1	15.8	53.05	Acute chorioamniotic disease stage I	1	05:47:00	38.9	1	3	3	01:36:00	4	3730	1	0	0	0
169	28	University graduate	24.4	1	39+	0	0	0	0	17.5	15.7	4.12	10.7	26.2	12.1	9.5	28.97	Normal	1	20:00:00	38.9	1	1	0	02:19:00	11	3020	1	0	0	0
170	30	University graduate	25.43	1	39+	0	0	0	0	7.4	5.5	2.67	11.1	24.1	11.9	9.1	97.15	Normal	1	00:44:00	38.1	1	0	0	01:04:00	6	3200	1	1	3	0
171	28	Doctor	30.11	1	40+	0	0	0	0	19.1	16.5	18.65	10.7	26.2	19.6	15.8	101.17	Normal	3+1	13:44:00	38.9	0	0	0	00:44:00	11	3480	0	0	0	0
172	34	University graduate	28.31	1	37+	0	0	0	0	8.2	5.8	2.91	11.1	24.1	14.1	11.3	107.26	Normal	1	1day + 16:46:00	38.4	1	3	0	00:44:00	11	3150	0	0	0	0
173	23	Trade school	27.39	1	39+	1	0	0	0	7.6	5.3	2.38	10.6	26.5	14.4	11.7	95.4	Normal	1	19:20:00	38.5	1	1	0	01:10:00	10	3730	1	0	2	0
174	28	University graduate	34.1	1	40+	0	0	1	0	15.6	14.3	10.7	10.6	26.6	15.8	14.1	75.02	Acute chorioamniotic disease stage IV	1	1day + 1:33:00	38.7	0	1	3	01:03:00	32	3830	1	0	1	1
175	32	University graduate	24.8	1	39+	0	0	0	0	8.4	6.5	2.6	11.5	26.6	10.2	7.9	30.93	Normal	1	23:27:00	38.4	1	0	0	01:07:00	8	3160	0	0	0	0
176	34	University graduate	29.52	1	40+	0	0	0	0	7.9	6.2	8.52	11.3	28.8	13.1	10.9	92.49	Normal	2	05:41:00	38.1	1	1	2	01:41:00	9	3540	0	0	2	0
177	27	Master	29.35	1	40+	0	0	0	0	9	7.4	20.22	10.1	29.1	9.8	8.2	106.7	Normal	1	18:30:00	38.7	0	3	3	01:07:00	8	3550	1	0	0	0
178	29	University graduate	28.22	1	38+	0	0	0	0	16.8	15.5	29.65	11.5	24.4	12	10.4	114.85	Acute chorioamniotic disease stage II	3	1day + 6:49:00	38.8	1	3	0	01:41:00	9	3420	1	0	1	1
179	28	University graduate	28.71	1	37+	0	0	0	0	13.3	12.5	21.26	11.4	27.9	16	13.2	101.29	Acute chorioamniotic disease stage II	1	18:25:00	39.9	1	1	0	02:55:00	10	3860	1	0	0	0
180	30	Master	28.76	1	39+	0	0	0	0	9.7	7.5	1.09	10.6	24.9	11.3	8.3	67.67	Normal	2	16:07:00	38.3	1	1	3	01:27:00	18	3130	0	0	0	0
181	33	Master	24.84	1	39+	0	0	0	0	23.2	21.6	46.38	10.6	28.2	14	11.8	145.4	Acute chorioamniotic disease stage I	3	19:46:00	38.4	0	3	0	01:41:00	9	3000	0	0	0	0
182	28	Master	24.84	1	40+	0	0	0	0	13.1	11.4	29.18	12.4	26.7	14.2	12	160	Acute chorioamniotic disease stage IV	1	08:54:00	39.2	1	3	0	02:55:00	10	3350	0	0	0	0
183	30	University graduate	28.16	1	39+	1	0	1	0	14.6	12.5	34.3	10.8	25.5	13.3	11.6	110.02	Acute chorioamniotic disease stage II	0	07:20:00	38.6	1	3	2	01:27:00	18	4750	1	0	6	0
184	31	University graduate	24.27	1	40+	0	0	0	0	6.9	5	1.73	9.8	28	14.7	11.3	63.03	Normal	0	1day + 2:39:00	38.1	1	2	0	03:59:00	6	4040	1	0	0	0
185	29	Master	28.51	1	40+	0	0	0	0	14.2	11.6	34.09	11.9	25.8	12.4	9.6	84.9	Normal	0	15:38:00	38.7	1	0	1	01:18:00	17	3520	1	0	0	0
186	26	University graduate	25.43	1	41+	0	0	0	0	20.9	18.9	1.73	11.3	26.1	15.5	12.1	46.92	Normal	1	11:33:00	38	0	1	0	01:53:00	7	3760	0	0	0	0
187	29	University graduate	22.63	1	38+	0	0	0	0	14.5	12.4	3.37	10.1	25.5	15.5	12.7	27.88	Normal	0	09:57:00	38.1	0	1	0	00:27:00	18	3150	1	0	0	0
188	28	Master	23.95	1	38+	0	0	0	0	6.8	4.9	3.37	10.2	25.7	10	7.7	69.81	Normal	1	22:27:00	38.3	1	1	0	01:57:00	8	3340	1	0	0	0
189	27	University graduate	25.4	1	39+	0	0	0	0	12.6	11.2	8.91	10.2	26.5	9.9	7.5	91.98	Normal	1	21:50:00	38.8	1	3	0	01:57:00	8	2850	0	0	0	0
190	23	University graduate	29.04	1	38+	0	0	0	0	9.1	6.7	12.53	11.2	21.7	9.9	6.8	41.71	Normal	1	13:10:00	38.2	0	0	0	00:30:00	20	2850	0	0	0	0
191	33	University graduate	25.03	1	39+	0	0	0	0	18.7	16.8	12.5	9.6	23.1	14.5	12.1	66.04	Acute chorioamniotic disease stage I	3+2+1	1day + 5:53:00	38.3	0	3	0	00:30:00	20	3030	1	0	2	0
192	29	University graduate	24.06	1	39+	0	0	0	0	11.3	9.7	3.86	10.2	25.1	10.3	8	33.57	Normal	0	06:59:00	38.6	1	0	0	02:39:00	6	3280	1	0	0	0
193	29	University graduate	26.4	1	37+	0	0	0	0	17.5	15.2	3.9	11.1	24.4	13.1	10.6	45.9	Normal	0	04:46:00	38.5	1	1	0	01:16:00	9	3120	0	0	0	0
194	26	University graduate	24.98	1	38+	0	0	0	0	7.4	5.1	3.5	10.5	25.4	7.4	5.1	30.08	Normal	2	00:24:00	38.2	0	0	0	00:24:00	6	2890	0	0	0	0
195	28	University graduate	23.93	1	40+	0	0	0	0	16.3	14.4	18.22	9.9	24.9	14.4	12.2	78.23	Normal	3	18:23:00	38.7	0	3	0	00:24:00	6	3250	0	0	0	0
196	31	University graduate	21.99	1	39+	0	0	0	0	7.3	5.7	5.93	10.6	22.3	12.6	10.8	74.42	Normal	1	08:28:00	38.4	1	1	3	01:09:00	7	3460	1	0	0	0
197	24	University graduate	25.25	1	38+	0	1	0	0	9.9	8.1	5	11	27.7	13.7	11.1	86.28	Normal	2+1	11:48:00	38.6	1	1	0	01:34:00	7	3400	1	0	0	0
198	30	University graduate	29.29	1	39+	1	0	0	0	11	9.6	39.63	10.7	22.8	9.9	7.9	160	Acute chorioamniotic disease stage III	1	09:39:00	38.2	0	3	3	01:34:00	7	3250	1	0	0	0
199	30	Master	23.88	1	40+	0	0	0	0	7.4	5.3	9.04	10.5	26	11.1	9.1	68.87	Normal	0	02:34:00	39	1	2	0	00:59:00	6	3960	1	1	3	0
200	30	Master	27.88	1	40+	0	0	0	0	7.4	4.4	14.21	11	27.1	14	11	49.89	Normal	1	16:08:00	38.7	1	0	0	00:58:00	7	2660	0	0	0	0
201	29	University graduate	32.09	1	40+	0	0	1	0	16.2	14.6	25.94	10.4	25.5	15	12.7	71.16	Acute chorioamniotic disease stage I	0	05:46:00	38.4	1	2	0	03:01:00	14	3530	0	0	0	0
202	31	Master	29.58	1	39+	0	0	0	0	15.5	14	22.04	10.5	23.2	16	14.7	177.32	Acute chorioamniotic disease stage III	2+3	13:02:00	39.8	0	3	0	03:01:00	14	3750	1	0	1	1
203	28	University graduate	24.24	1	39+	0	0	1	0	10.2	7.7	1.31	10.5	26.9	13.7	10.8	33.85	Normal	1	05:08:00	39.5	0	0	0	01:18:00	22	3400	1	0	0	0
204	24	University graduate	24.39	1	37+	0	0	0	0	16.6	14	11.29	11	25.1	9.7	6.6	29.24	Normal	0	00:43:00	38.1	1	0	1	00:43:00	7	3280	1	0	0	0
205	35	University graduate	24.6	1	40+	0	0	0	0	10.5	8.8	4.35	11.1	23.7	12.3	9.4	109.68	Normal	0	03:38:00	38.2	1	1	2	01:03:00	12	3200	0	0	0	0
206	31	University graduate	25.58	1	38+	0	1	0	0	7.8	5.6	1.27	10.1	28.4	13	10.3	57.79	Normal	3+1	1day + 5:10:00	38.1	1	1	0	01:55:00	10	3430	1	0	2	0
207	24	University graduate	27.23	1	40+	0	0	0	0	15.4	13.6	16.22	9.7	23.8	18.3	15.6	71.3	Normal	1	2days + 20:36:00	38.3	1	1	0	00:56:00	4	3600	0	0	0	0
208	28	Doctor	24.95	1	41+	0	0	0	0	8.6	7	0.3	11.1	23.5	16.6	14	60.11	Normal	2+1	06:11:00	38.2	1	0	0	02:41:00	19	3900	0	0	0	0
209	33	University graduate	25.5	1	40+	0	0	0	0	9	7.4	2.15	10.5	25.4	13.8	11.4	62.52	Normal	0	10:12:00	38.2	1	0	0	02:42:00	33	3550	0	0	2	0
210	30	Master	25.11	1	41+	0	0	0	0	14.6	13	13.41	11.4	27.4	14.3	11	40.43	Normal	3	01:25:00	39.7	1	0	0	01:25:00	10	3280	1	0	0	0
211	29	Master	29.29	1	40+	1	0	0	0	24.5	22.2	12.7	10.8	25.3	13.6	11.2	45.06	Normal	3+1	09:09:00	38.7	1	2	3	02:34:00	16	3470	0	0	2	0
212	27	University graduate	25.1	1	39+	1	0	1	0	8.9	7.2	0.51	10.7	23.5	9.4	7	26.72	Normal	1	01:43:00	38.4	0	1	0	00:33:00	7	3260	1	0	0	0
213	28	University graduate	25.97	1	40+	1	0	0	0	11.6	9.1	58.82	11.5	27	9.8	6.8	98.23	Normal	2+1	2days + 7:51:00	38.1	1	3	0	00:33:00	7	3850	1	0	0	0
214	26	University graduate	27.68	1	38+	0	0	0	0	10.3	8	19.52	11.5	26	18.3	14.6	157.84	Acute chorioamniotic disease stage I	0	10:44:00	39.2	0	1	0	02:59:00	11	3590	1	0	0	0
215	25	University graduate	30	1	40+	0	0	0	0	8.4	6.3	3.56	9.6	27.5	12.3	9.8	69.13	Normal	0	02:43:00	38.7	1	0	0	00:33:00	7	3050	0	0	1	1
216	30	Master	31.02	1	40+	0	0	0	0	18.6	16.9	22.02	10.4	27.4	16	13	53.37	Normal	1	02:36:00	38.5	1	0	0	01:51:00	9	3080	1	0	1	1
217	28	University graduate	24.06	1	41+	0	0	0	0	7.7	5.9	6	10.3	25.6	13.2	10.4	110.33	Acute chorioamniotic disease stage II	1	11:23:00	38.3	1	2	0	00:33:00	7	3770	1	0	0	0
218	31	University graduate	30.45	1	41+	0	0	0	0	15.7	14.2	32.91	9.7	27.4	13.2	10.4		Normal	1	2days + 23:24:00	39.1	1	2	3	00:14:00	6	2780	1	0	1	1
219	32	University graduate	29.4	1	38+	0	0	0	0	8	6.6	4.5	11.4	27.7	12.9	10.7	65.8	Normal	3	01:30:00	38.3	1	0	0	01:00:00	5	3380	1	0	0	0
220	31	University graduate	24.15	1	37+	0	0	0	0	15.6	13.3	16.02	9.8	22.4	12.8	10.6	37.07	Acute chorioamniotic disease stage II	0	12:14:00	38.9	1	2	0	02:45:00	6	2900	1	0	0	0
221	24	University graduate	25	1	40+	0	0	0	0	18.6	16.5	76.41	10.3	27.6	14	11.2	80.25	Acute chorioamniotic disease stage II	3+1	11:57:00	38.8	1	1	3	01:15:00	5	3220	0	0	0	0
222	36	Trade school	28.44	3	39+	0	0	0	0	8.6	7.2	3.57	10.2	21.4	7.9	6	21.34	Normal	人工破膜	04:10:00	38.1	0	0	0	00:11:00	9	3380	0	0	0	0
223	36	University graduate	25.86	2	38+	1	0	0	0	10.8	9.2	0.63	11	25.2	7.4	5.6	4.53	Normal	0	00:09:00	38.1	0	0	0	00:09:00	6	3390	0	0	0	0
224	35	University graduate	21.89	1	38+	0	0	0	0	7.1	4.5	0.63	9.6	26.6	14.2	11.2	32.37	Normal	0	1day + 6:13:00	38.4	1	1	0	01:23:00	7	3100	1	0	2	0
225	26	University graduate	26.56	1	40+	0	0	0	0	9.5	8	3.46	11.4	27.1	9.7	6.9	35.65	Normal	0	00:19:00	38.1	0	1	3	00:59:00	6	2730	0	0	0	0
226	29	University graduate	28	1	41+	0	0	0	0	11.3	10.1	12.53	10.8	24.6	13.3	11	114.53	Acute chorioamniotic disease stage II	1	1day + 0:15:00	39.4	1	3	0	00:59:00	6	3900	0	0	2	0
227	27	Master	27.18	1	39+	0	0	0	0	10.7	7.3	22.02	10.3	27	16.2	13.1	72.67	Normal	0	01:52:00	38.3	1	0	0	01:52:00	3	3300	1	0	0	0
228	28	University graduate	25.19	1	40+	0	0	0	0	7.6	5.2	3.91	11.2	29.2	9.6	6.7	56.49	Normal	3	12:12:00	38.5	1	1	0	01:02:00	8	3270	0	0	0	0
229	30	University graduate	26.53	1	39+	0	0	1	0	7.8	6.5	7.94	10.8	25.7	12.3	10.6	104.8	Normal	0	11:24:00	38.1	1	3	2	01:52:00	3	3600	1	0	0	0
230	27	University graduate	25.34	1	40+	0	0	0	0	12	10.7	22.02	10.6	25.7	11.1	8.3	160	Acute chorioamniotic disease stage I	1	04:20:00	39.9	1	3	1	01:02:00	8	3450	0	0	0	0
231	32	University graduate	26.95	1	40+	0	0	0	0	7.6	6.1	2.24	10.8	25.7	11.2	9	78.55	Normal	1	01:45:00	38.6	1	1	1	01:45:00	15	3370	0	0	0	0
232	25	University graduate	24.67	1	39+	0	0	0	0	7.6	6	1.06	12.3	26.2	11.8	9	36.19	Normal	0	00:42:00	38.1	1	0	0	00:32:00	8	3210	0	0	0	0
233	31	Master	21.64	1	40+	0	0	0	0	6.7	4.9	1.73	10.5	26.6	10.7	8.4	22.85	Normal	2+1	01:27:00	38.1	1	0	0	00:32:00	18	3440	0	0	0	0
234	30	Master	27.8	1	40+	0	0	1	0	12.3	10.1	2.15	11.6	28.5	15.7	13.8	54.22	Normal	0	01:08:00	38.1	1	0	0	01:08:00	12	3280	1	0	0	0
235	31	University graduate	29.17	1	40+	1	0	0	0	21.7	19.9	51.87	11.3	27	15.2	13.8	145.01	Acute chorioamniotic disease stage III	3+1	13:24:00	38.5	1	3	0	00:32:00	18	4000	1	0	0	0
236	27	University graduate	26.04	1	39+	0	0	0	0	24.2	20.5	11.75	11	27.3	27.6	23.6	111.1	Acute chorioamniotic disease stage I	0	03:59:00	38.5	0	3	2	01:08:00	12	3700	1	0	1	1
237	30	University graduate	26.96	1	39+	0	0	0	0	13.7	12.4	20	9.4	25.7	13.5	10.8	77.98	Acute chorioamniotic disease stage III	0	13:09:00	39.1	1	0	3	02:04:00	11	3550	1	0	0	0
238	27	University graduate	24.21	1	39+	0	0	0	0	15.5	13.6	7.69	10.4	25.8	12.4	8.8	42.07	Normal	3+2+1	06:45:00	38.4	1	0	0	02:15:00	15	3350	1	0	1	1
239	29	University graduate	23.71	1	37+	0	0	0	0	8.6	6	2.54	9.4	26.8	14.4	11.6	52.09	Normal	1	23:30:00	38.1	1	0	0	01:00:00	15	3050	0	0	0	0
240	28	University graduate	26.91	1	40+	0	0	0	0	9.4	7	1.96	11	23.8	16.8	14	71.64	Normal	3	06:57:00	38.3	1	0	0	03:07:00	8	3380	0	0	2	0
241	36	University graduate	27.76	2	39+	1	0	1	0	7.6	4.6	1.4	11	24.1	11.2	8.2	60.66	Normal	0	07:21:00	38.7	0	0	0	00:36:00	9	4120	1	0	0	0
242	28	University graduate	27.68	1	40+	0	0	0	0	7	5.1	0.5	11.1	27	14.2	11.3	27.03	Normal	0	02:47:00	38.5	1	1	3	02:47:00	8	3980	1	0	0	0
243	27	University graduate	24.73	1	40+	0	0	1	0	7.3	5.5	0.1	10.9	23.3	12.3	9.1	39.03	Normal	3+1	09:19:00	38.8	1	1	0	01:24:00	6	3630	0	0	0	0
244	25	University graduate	26.23	1	39+	0	0	1	0	19.5	17.2	0.1	11.7	24.5	16.6	12.7	1119.11	Normal	0	05:56:00	38.4	0	1	0	00:36:00	9	3160	0	0	1	1
245	26	University graduate	25.83	1	40+	0	0	0	0	20.4	18.9	18.18	10.8	22.9	17.1	14.6	45.07	Normal	3	04:17:00	38.5	1	1	0	01:17:00	13	3810	0	0	0	0
246	29	University graduate	29.66	2	41+	0	0	0	0	11.2	9.5	11.9	11.7	25.7	14.3	11.7	98.03	Normal	0	00:23:00	38.4	0	0	0	00:23:00	32	3990	1	0	0	0
247	29	University graduate	24.6	1	38+	0	0	0	0	15.8	14.9	26.17	11.7	29.5	16.8	14	70.51	Normal	1	18:23:00	38.5	0	0	0	02:21:00	4	3350	0	0	1	1
248	28	University graduate	24.43	1	38+	0	0	1	0	13	11.6	13.4	10.3	24.4	13.4	11.5	160	Normal	0	05:32:00	39.2	1	3	3	00:59:00	6	3100	0	0	0	0
249	37	Master	27.53	1	39+	1	0	1	0	9.8	8.7	49	10.9	25	10.3	8.7	160	Acute chorioamniotic disease stage III	3+1+2	12:10:00	38.9	0	3	3	02:21:00	4	3500	1	1	3	0
250	27	University graduate	26.95	1	38+	0	0	0	0	7.5	6.2	4.31	10.4	27	11.1	9.2	26.15	Normal	3	15:58:00	38.1	0	0	0	00:46:00	7	2710	0	0	0	0
251	25	University graduate	30.04	1	39+	0	1	1	0	8.4	6.1	0.9	10.7	24.9	15.7	13.1	69.73	Normal	3	04:44:00	38.4	1	0	1	02:14:00	16	3390	1	0	2	0
252	26	Trade school	29.4	1	41+	0	0	0	0	18.8	16.5	20.8	12.1	24	14.8	12.2	160	Acute chorioamniotic disease stage I	2	07:06:00	38.7	1	3	0	02:14:00	16	3670	1	0	1	1
253	27	University graduate	27.81	1	41+	0	0	0	0	10.6	8.9	28.33	11.1	24.5	12.4	9.6	67.29	Normal	2+1	2days + 3:47:00	38.1	1	0	0	00:32:00	18	3290	0	0	0	0
254	26	University graduate	23.61	1	40+	0	0	0	0	5.5	3.9	0.4	11.3	29.7	14.4	12	32.58	Normal	1	08:44:00	38.2	1	3	0	00:32:00	18	3700	1	0	0	0
255	27	University graduate	24.51	1	40+	0	0	0	0	8.3	6.5	1.3	10.6	25.5	12.9	10.7	69.51	Normal	0	09:46:00	38.2	1	0	0	01:06:00	14	3750	1	0	0	0
256	27	University graduate	26.56	1	39+	0	0	0	0	14.7	11.8	4.65	11	25.4	14	11.6	132.11	Acute chorioamniotic disease stage I	1	2days + 15:32:00	38.6	0	3	0	01:06:00	14	3700	0	0	0	0
257	23	University graduate	29.66	1	40+	0	0	0	0	8.6	6.1	2.16	11.6	22.2	9.8	7	35.82	Normal	1	16:44:00	38.5	1	1	0	00:44:00	11	3240	0	0	1	1
258	29	University graduate	25.39	1	41+	0	0	0	0	13.5	11.6	7.13	10.9	25.7	14.7	12.7	118.35	Acute chorioamniotic disease stage I	3	06:24:00	39.4	1	3	0	00:44:00	11	3450	0	0	0
259	31	Master	26.83	1	39+	0	0	0	0	8.1	5.9	0.76	11.9	26.4	12.4	9.4	36.54	Normal	0	16:02:00	38.5	1	0	0	01:17:00	18	3420	1	0	0	0
260	29	University graduate	28.35	1	38+	1	0	0	0	7.8	5.4	3.89	11.5	24.3	11.8	9.1	82.98	Normal	1	17:06:00	38.3	1	0	0	01:11:00	9	3380	1	0	0	0
261	25	Master	25.25	1	39+	0	0	1	0	14.5	13.1	16.73	11.1	26.2	10.4	8	49.91	Normal	1	04:43:00	38.3	1	0	0	00:43:00	7	3450	1	0	0	0
262	29	University graduate	26.83	1	39+	0	0	1	0	12.9	10.4	1.57	11.1	23.8	11	8.4	32.99	Normal	0	03:46:00	38.1	0	2	3	00:16:00	9	3130	0	0	0	0
263	28	University graduate	35.77	1	39+	1	0	0	0	8	7.4	68.87	13	24.3	5.9	5.4	88.64	Normal	1	08:30:00	38.5	0	3	0	01:11:00	9	4230	1	0	0	0
264	34	Master	23.05	1	40+	0	0	0	0	14.3	13.4	59.27	11.1	23.7	13.5	12	160	Normal	3	13:30:00	38.2	1	3	0	00:43:00	7	3750	0	0	2	0
265	28	University graduate	29.17	1	41+	0	0	0	0	16.8	14.4	16.66	11	25.9	16	13.9	160	Acute chorioamniotic disease stage II	2	11:19:00	38.7	0	3	3	00:16:00	9	4250	1	0	1	1
266	28	Master	24.6	1	40+	0	0	0	0	9.4	7.8	18.03	11.7	25.5	11.1	8.4	60	Normal	1	19:07:00	38.3	1	1	0	01:07:00	8	3030	0	0	7	0
267	28	University graduate	31.22	1	41+	0	0	0	0	16.3	14.4	38.4	11.4	26.4	15.5	13.4	160	Acute chorioamniotic disease stage II	2+1	09:15:00	38.3	0	3	0	01:07:00	8	3950	0	0	0	0
268	28	University graduate	23.22	1	39+	0	0	0	0	7.8	6.2	38.4	11.3	23.2	9.3	7.6	34.35	Normal	0	02:31:00	38.5	1	0	1	02:31:00	9	3520	1	0	0	0
269	30	University graduate	26.6	1	39+	0	1	0	0	12.7	11.1	20.18	11.2	25.4	11.1	9.1	133.16	Acute chorioamniotic disease stage I	3+1	02:22:00	39.3	1	3	0	02:31:00	9	2950	1	0	0	0
270	27	University graduate	24.41	1	39+	0	0	1	0	11.6	9.1	6.32	11.6	25.1	17.1	13.9	113.65	Normal	0	07:41:00	38.7	1	1	0	02:46:00	9	2990	1	0	1	1
271	34	University graduate	22.3	1	39+	0	0	0	0	7	5	0.9	10.8	23.8	10.4	7.2	81.51	Normal	0	03:45:00	38.4	1	1	0	00:55:00	10	3200	1	0	0	0
272	31	Master	28.9	1	40+	0	0	0	0	20.4	18.7	34.75	11.2	30.1	17	14.1	39.55	Acute chorioamniotic disease stage II	1	06:00:00	38.7	0	2	0	01:00:00	20	3960	1	0	0	0
273	31	University graduate	28.51	1	41+	0	0	0	1	11.7	9	5.66	11.6	24	9.7	7.5	52.47	Normal	1	01:53:00	38.3	0	1	0	01:09:00	16	3510	0	0	1	1
274	28	University graduate	26.15	1	40+	0	0	0	0	8.2	7.1	6.3	10.5	27.1	10.5	8.1	74.4	Normal	0	00:48:00	38.4	1	1	0	01:33:00	7	3490	1	0	0	0
275	28	Master	25.1	1	40+	0	0	1	0	10.9	9.3	12.5	9.5	25	8.2	6.7	20.8	Normal	0	03:58:00	38.4	0	1	0	00:38:00	12	3620	0	0	0	0
276	34	University graduate	30.75	1	37+	0	0	1	0	18.6	16.9	16.4	10.5	28.4	10.4	8.1	79.9	Normal	1	1day + 14:28:00	38.8	1	0	0	00:38:00	12	3620	0	0	0	0
277	28	University graduate	26.49	1	38+	0	0	0	0	13.7	12.3	45.9	11.8	32.9	9.9	8.1	68.1	Acute chorioamniotic disease stage I	0	07:58:00	38.7	1	1	3	01:49:00	11	3480	1	1	3	0
278	32	University graduate	28.92	1	40+	0	0	0	0	11.2	9.3	14	9.8	20	9.9	7.3	74.7	Normal	0	00:02:00	38.3	1	0	0	00:12:00	8	3330	0	0	0	0
279	28	University graduate	29.76	1	40+	0	0	0	0	20.1	18.4	19.3	10.3	24.4	16.3	14	160	Acute chorioamniotic disease stage II	2	08:58:00	38.5	1	3	0	01:49:00	11	3900	1	0	0	0
280	31	Master	27.96	1	39+	0	0	1	0	10.6	9	2.9	10.2	23.8	8.9	6.6	96.8	Acute chorioamniotic disease stage II	0	13:28:00	38.7	1	3	2	00:12:00	8	3550	1	0	0	0
281	28	University graduate	24.21	1	41+	0	0	0	0	7.6	5.7	2.58	10.1	28.4	9	6.7	67.1	Normal	2	17:49:00	38.8	1	2	0	03:04:00	6	3420	0	0	1	1
282	28	University graduate	25.78	1	39+	0	0	0	0	11.9	9.4	8.9	10.5	26.9	10.3	7.6	37.1	Normal	1	03:16:00	38.6	1	1	0	00:33:00	7	3280	1	0	0	0
283	28	University graduate	23.42	1	39+	1	0	1	0	20	18.5	18.9	10.5	24.4	10.8	8.7	28.6	Normal	0	1day + 3:29:00	38.6	1	0	0	01:00:00	6	2880	1	0	0	0
284	29	University graduate	28.93	1	41+	0	0	0	0	10.9	9.3	2.8	10.4	25.6	9.8	7.5	10.8	Normal	1	1day + 16:55:00	39	1	1	2	04:15:00	5	3770	0	0	0	0
285	31	University graduate	25.91	1	39+	0	0	0	0	17.1	15.7	91.1	10.2	24.8	14	10.9	64.8	Acute chorioamniotic disease stage II	1	1day + 10:00:00	38.8	1	1	3	02:04:00	5	3040	0	0	1	1
286	28	University graduate	35.65	1	38+	0	0	0	0	21	18.9	72.6	10.6	28.8	17.7	14.8	115.8	Normal	0	08:14:00	38.7	1	1	1	02:29:00	6	3490	0	0	0	0
287	28	University graduate	25.91	1	41+	0	0	1	0	14.2	12.6	14.9	10.1	27.1	13.7	10.3	63.2	Normal	0	13:42:00	38.6	1	1	1	02:42:00	8	3650	1	0	0	0
288	28	University graduate	35.65	1	38+	0	0	0	0	8.5	6.5	14.9	10.8	31	8.4	6.3	37.8	Normal	0	04:43:00	38.3	1	1	0	01:33:00	2	3070	1	0	0	0
289	31	University graduate	29.17	1	39+	0	0	0	0	16.9	15.6	4.7	10.3	24.9	17.6	16.1	96	Acute chorioamniotic disease stage I	0	14:53:00	40.1	1	2	0	01:58:00	7	3580	1	1	3	0
290	25	University graduate	28.51	1	40+	0	0	0	0	8.6	7	5.2	11	24.9	16.3	14.1	160	Acute chorioamniotic disease stage I	0	11:07:00	38.4	1	2	2	04:02:00	8	3360	1	0	2	0
291	30	University graduate	24.78	1	38+	0	0	0	0	10.5	8.7	0.58	10.2	24.7	13.7	10.9	53.58	Normal	0	02:18:00	38.1	0	0	0	01:13:00	17	3140	1	0	0	0
292	26	University graduate	25.59	1	40+	0	0	0	0	13.5	11.4	7.74	11.2	26.3	16.7	13.9	75.97	Normal	0	02:39:00	38	1	1	0	02:39:00	16	2920	1	0	0	0
293	27	University graduate	20.82	1	39+	0	0	0	0	9.4	8.1	2.64	9.9	22.5	7.6	6.7	21.01	Normal	0	02:10:00	38.3	0	0	0	01:50:00	10	3635	1	0	2	0
294	28	University graduate	21.82	1	40+	0	0	0	0	5.8	4	1.32	9.3	23	13	8.7	15.21	Normal	0	01:22:00	38.1	0	0	0	01:02:00	8	3440	1	0	0	0
295	26	University graduate	27.58	1	40+	0	0	1	0	10.2	7.7	24.43	9.9	31.4	10.7	8.9	52.77	Normal	0	03:38:00	38.2	1	0	0	01:13:00	7	3120	1	0	0	0
296	33	University graduate	26.1	1	39+	0	0	0	0	5.2	3.5	28.79	10.6	27.2	12.9	8.6	76.85	Normal	1	02:32:00	38.1	1	0	0	01:02:00	13	3300	1	0	0	0
297	29	Master	22.88	1	40+	1	0	0	0	7.3	5	0.82	10.2	21.5	14.3	11.6	37.18	Normal	0	06:56:00	38.3	1	0	0	01:36:00	4	3290	0	0	0	0
298	29	University graduate	27.05	1	39+	0	0	0	0	11.7	9.4	2.2	9.6	24.8	18.1	15.8	53.05	Acute chorioamniotic disease stage I	1	05:47:00	38.9	1	3	3	01:36:00	4	3730	1	0	0	0
299	28	University graduate	24.4	1	39+	0	0	0	0	17.5	15.7	4.12	10.7	26.2	12.1	9.5	28.97	Normal	1	20:00:00	38.9	1	1	0	02:19:00	11	3020	1	0	0	0
300	30	University graduate	25.43	1	39+	0	0	0	0	7.4	5.5	2.67	11.1	24.1	11.9	9.1	97.15	Normal	1	00:44:00	38.1	1	0	0	01:04:00	6	3200	1	1	3	0
301	29	University graduate	23.87	1	38+	0	0	0	0	9.3	7.4	4.7	10.2	23.8	10.7	8.2	65.5	Normal	0	08:03:00	39.6	1	0	0	00:43:00	7	3820	1	0	0	0
302	30	University graduate	23.87	1	41+	0	0	1	0	17.1	8.7	35.8	11	26.3	9.9	6.7	53.1	Normal	1+2	08:46:00	38.2	1	1	0	01:51:00	9	3440	0	0	0	0
303	28	University graduate	26.22	1	38+	0	0	0	0	13.5	11.4	35.8	11.3	30.3	11.8	9.4	60.9	Normal	0	08:15:00	38.3	1	1	0	01:47:00	13	3270	1	0	0	0
304	27	University graduate	23.8	1	39+	0	0	0	0	14.9	13.1	14.4	9.9	24.9	10.4	8	54.4	Acute chorioamniotic disease stage II	0	14:20:00	38.5	1	1	0	03:20:00	25	2740	0	0	2	0
305	27	University graduate	29.29	1	40+	0	0	0	0	13.8	12.1	9	10.5	21.8	16.5	13.6	97	Normal	0	05:44:00	38.3	0	3	3	04:15:00	5	3600	1	0	0	0
306	25	University graduate	24.06	1	40+	0	0	0	0	6.4	5.1	5.15	10.5	28.5	9.3	7.4	23.6	Normal	1	01:35:00	38.2	1	1	0	02:50:00	10	3210	0	0	0	0
307	29	Master	27.46	1	40+	0	0	0	0	18.7	16.2	42.5	10.9	29	15.8	12.6	100	Acute chorioamniotic disease stage II	0	07:01:00	38.5	1	1	3	03:01:00	14	3180	1	1	3	0
308	24	Trade school	27.55	1	39+	0	0	0	0	8.2	6.5	5.5	11.5	34.8	10.4	8.1	36.7	Normal	0	01:02:00	38.1	1	0	2	01:02:00	8	3460	0	0	0	0
309	26	University graduate	26.26	1	39+	0	0	0	0	12.5	11.4	5.4	10.5	22.5	7	4.7	33	Acute chorioamniotic disease stage I	3	1day + 5:39:00	38.6	1	1	0	00:59:00	21	3280	0	0	0	0
310	27	University graduate	24.72	1	38+	0	0		0	11.1	10.1	13	10.2	27.6	11.5	9.3	66	Normal	0	03:25:00	38.1	1	1	1	02:21:00	5	3560	1	0	0	0
311	28	Trade school	32.04	1	41+	0	0	0	0	13	11.7	7.9	10.9	27.3	10.4	8.2	125.8	Normal	1	09:10:00	38.4	0	3	0	02:21:00	5	4100	0	0	0	0
312	27	University graduate	25.39	1	40+	0	0	0	0	9.7	7.3	4.19	10.3	26.7	14.3	11.3	69.3	Acute chorioamniotic disease stage III	3+1	22:01:00	38.3	0	1	0	02:41:00	4	3820	0	0	0	0
313	31	University graduate	26.56	1	39+	0	0	1	0	20.3	18.3	11.5	10.4	23.6	17	13.3	102.41	Normal	1	1day + 3:06:00	38.4	1	1	0	01:51:00	14	3050	1	0	0	0
314	29	University graduate	33.62	1	39+	0	0	0	0	11.7	8.9	1	10.8	29.3	13.3	10.7	48	Normal	1	23:44:00	38.1	1	3	0	02:41:00	4	3650	1	0	0	0
315	26	University graduate	28.95	1	40+	0	0	0	0	14.6	12.3	29.4	10.4	27.9	7.4	5.2	33.9	Acute chorioamniotic disease stage II	1	1day + 21:57:00	38.5	1	1	3	04:03:00	7	3500	1	0	1	1
316	27	University graduate	24.24	1	40+	0	0	0	0	18.4	17	45.29	9.9	33.3	14.2	11.9	86.33	Normal	0	06:12:00	39.1	1	1	0	01:17:00	3	3380	1	0	0	0
317	30	University graduate	25.15	1	39+	0	0	0	0	12.8	11.2	45.29	10.5	24.7	13.3	10.7	66.1	Acute chorioamniotic disease stage I	0	23:11:00	38.8	1	1	0	03:11:00	4	2980	0	0	4	0
318	28	University graduate	31.03	1	39+	0	1	0	0	18	15.8	19.34	9.6	27.2	12.6	9.6	31.42	Normal	1+2	1day + 5:23:00	38.6	1	1	0	01:34:00	7	3750	1	0	0	0
319	30	University graduate	27.36	1	39+	0	0	0	0	18.7	16.1	16.04	11.2	25.8	17.2	14.3	120.43	Acute chorioamniotic disease stage I	0	06:38:00	39.4	1	2	0	02:13:00	7	3300	1	1	3	0
320	25	Trade school	28.08	1	40+	0	0	0	0	13	11.2	10.7	9.9	26.3	13.6	11.3	80.57	Normal	1	03:18:00	38	1	1	3	00:36:00	7	3820	1	0	5	0
321	28	Doctor	30.11	1	40+	0	0	0	0	19.1	16.5	18.65	10.7	26.2	19.6	15.8	101.17	Normal	3+1	13:44:00	38.9	0	0	0	00:44:00	11	3480	0	0	0	0
322	34	University graduate	28.31	1	37+	0	0	0	0	8.2	5.8	2.91	11.1	24.1	14.1	11.3	107.26	Normal	1	1day + 16:46:00	38.4	1	3	0	00:44:00	11	3150	0	0	0	0
323	23	Trade school	27.39	1	39+	1	0	0	0	7.6	5.3	2.38	10.6	26.5	14.4	11.7	95.4	Normal	1	19:20:00	38.5	1	1	0	01:10:00	10	3730	1	0	2	0
324	28	University graduate	34.1	1	40+	0	0	1	0	15.6	14.3	10.7	10.6	26.6	15.8	14.1	75.02	Acute chorioamniotic disease stage IV	1	1day + 1:33:00	38.7	0	1	3	01:03:00	32	3830	1	0	1	1
325	32	University graduate	24.8	1	39+	0	0	0	0	8.4	6.5	2.6	11.5	26.6	10.2	7.9	30.93	Normal	1	23:27:00	38.4	1	0	0	01:07:00	8	3160	0	0	0	0
326	34	University graduate	29.52	1	40+	0	0	0	0	7.9	6.2	8.52	11.3	28.8	13.1	10.9	92.49	Normal	2	05:41:00	38.1	1	1	2	01:41:00	9	3540	0	0	2	0
327	27	Master	29.35	1	40+	0	0	0	0	9	7.4	20.22	10.1	29.1	9.8	8.2	106.7	Normal	1	18:30:00	38.7	0	3	3	01:07:00	8	3550	1	0	0	0
328	29	University graduate	28.22	1	38+	0	0	0	0	16.8	15.5	29.65	11.5	24.4	12	10.4	114.85	Acute chorioamniotic disease stage II	3	1day + 6:49:00	38.8	1	3	0	01:41:00	9	3420	1	0	1	1
329	28	University graduate	28.71	1	37+	0	0	0	0	13.3	12.5	21.26	11.4	27.9	16	13.2	101.29	Acute chorioamniotic disease stage II	1	18:25:00	39.9	1	1	0	02:55:00	10	3860	1	0	0	0
330	30	Master	28.76	1	39+	0	0	0	0	9.7	7.5	1.09	10.6	24.9	11.3	8.3	67.67	Normal	2	16:07:00	38.3	1	1	3	01:27:00	18	3130	0	0	0	0
331	27	University graduate	29.27	1	39+	1	0	1	0	16.9	14.7	19.44	10.1	23.7	12.4	9.4	94.52	Acute chorioamniotic disease stage I	1+3	22:30:00	39	1	0	0	00:57:00	3	3580	1	0	0	0
332	30	University graduate	27.91	1	39+	0	0	0	0	8	5.7	5.14	9.1	23.3	10.1	7.7	50.79	Normal	1	19:10:00	38.1	0	1	0	02:35:00	5	3300	0	0	0	0
333	34	University graduate	30.67	1	39+	0	0	0	0	14	13.2	43.47	10.1	27.5	13.8	11.4	119.34	Normal	1	06:21:00	38.5	1	0	3	00:41:00	9	3780	0	0	0	0
334	32	Master	26.22	1	40+	0	0	0	0	19.7	18.3	10.47	10.1	25.5	21	18.3	52.16	Normal	0	15:30:00	38.8	1	1	0	01:00:00	10	3810	1	0	1	1
335	25	University graduate	23.73	1	39+	0	0	0	0	11.4	9.7	9.3	10.3	30.2	9.9	8	119	Acute chorioamniotic disease stage I	0	08:44:00	39.2	1	3	0	01:51:00	14	3350	1	0	1	1
336	27	University graduate	23.73	1	38+	0	0	0	0	13.8	11.8	8.3	10.2	27.3	15.5	12.3	44.12	Normal	0	04:39:00	38.8	1	1	0	02:09:00	8	2960	1	0	4	0
337	28	University graduate	26.74	1	39+	0	0	0	0	60	4.1	5.14	10.1	23	10.7	8	43.94	Normal	0	07:58:00	38.1	0	1	0	01:02:00	7	4130	1	0	0	0
338	29	University graduate	23.87	1	40+	0	0	1	0	9.3	7.9	30.62	10.8	32.8	12.6	10.2	44.41	Normal	0	01:41:00	38.3	1	1	1	01:41:00	2	3680	1	0	0	0
339	28	University graduate	23.63	1	39+	0	0	0	0	7.5	5.4	4	10.6	26.6	12.4	9.5	101.57	Normal	1	00:33:00	38.5	1	0	0	00:33:00	7	3530	1	0	0	0
340	37	Trade school	29.62	2	39+	0	0	1	0	8.5	6.6	11.26	10.2	24.1	7.8	5.3	31.64	Normal	3	01:29:00	38	0	0	0	00:09:00	6	3450	1	0	0	0
341	27	University graduate	28.76	1	38+	0	0	0	0	14.4	12.9	2.74	9.9	26	12.2	9.7	20.82	Normal	0	04:02:00	38.9	1	0	0	01:42:00	8	3310	1	0	1	1
342	29	University graduate	27.38	1	41+	0	0	0	0	12.9	10.8	15.94	9.8	25.1	9.1	6.7	105.18	Normal	0	14:41:00	38.7	1	1	0	01:53:00	7	4120	0	0	0	0
343	30	Trade school	27.67	3	38+	0	0	0	0	13.3	11.2	20.94	11.7	31.5	12.1	10	55.91	Acute chorioamniotic disease stage II	0	22:11:00	39	0	0	3	00:06:00	9	3100	0	0	0	0
344	32	University graduate	27.05	1	39+	0	0	0	0	15.6	14.3	23.89	11.4	27.4	12.1	10	55.91	Normal	1	1day + 5:14:00	38.5	1	1	3	02:34:00	6	3820	1	0	0	0
345	25	University graduate	29.55	1	40+	0	0	0	0	16.2	13.5	3.55	10.2	24	8.8	6.4	93.85	Normal	3	16:30:00	38.9	0	3	0	00:41:00	9	3900	1	1	3	0
346	28	University graduate	26.03	1	35+	0	0	1	0	21.2	19.1	84.12	10.4	27.5	14	11.9	150.66	Normal	0	1day + 5:40:00	38.2	1	3	0	01:00:00	10	2550	0	0	2	0
347	23	University graduate	33.98	1	39+	0	0	0	0	14.6	13.2	26.81	11	24.6	9.8	8	156.64	Normal	0	16:40:00	39	1	0	0	01:40:00	10	3680	0	0	0	0
348	29	University graduate	28.51	1	39+	0	0	0	0	16.5	14.8	39.17	11	26.3	13	11.5	98.05	Normal	0	06:39:00	38.5	0	2	0	00:59:00	18	2780	0	0	1	1
349	28	University graduate	27.01	1	40+	0	0	0	0	9.8	8.1	6.18	10.8	27.7	14.6	12.3	85.98	Normal	0	14:07:00	39	1	1	3	01:47:00	3	4360	1	0	1	1
350	27	University graduate	25.46	1	39+	0	0	1	0	8.5	6.3	1.54	9.9	26.6	7.7	5.8	26.09	Normal	0	05:15:00	38.1	1	2	0	02:35:00	10	3790	0	0	2	0
351	33	Master	24.84	1	39+	0	0	0	0	23.2	21.6	46.38	10.6	28.2	14	11.8	145.4	Acute chorioamniotic disease stage I	3	19:46:00	38.4	0	3	0	01:41:00	9	3000	0	0	0	0
352	28	Master	24.84	1	40+	0	0	0	0	13.1	11.4	29.18	12.4	26.7	14.2	12	160	Acute chorioamniotic disease stage IV	1	08:54:00	39.2	1	3	0	02:55:00	10	3350	0	0	0	0
353	30	University graduate	28.16	1	39+	1	0	1	0	14.6	12.5	34.3	10.8	25.5	13.3	11.6	110.02	Acute chorioamniotic disease stage II	0	07:20:00	38.6	1	3	2	01:27:00	18	4750	1	0	6	0
354	31	University graduate	24.27	1	40+	0	0	0	0	6.9	5	1.73	9.8	28	14.7	11.3	63.03	Normal	0	1day + 2:39:00	38.1	1	2	0	03:59:00	6	4040	1	0	0	0
355	29	Master	28.51	1	40+	0	0	0	0	14.2	11.6	34.09	11.9	25.8	12.4	9.6	84.9	Normal	0	15:38:00	38.7	1	0	1	01:18:00	17	3520	1	0	0	0
356	26	University graduate	25.43	1	41+	0	0	0	0	20.9	18.9	1.73	11.3	26.1	15.5	12.1	46.92	Normal	1	11:33:00	38	0	1	0	01:53:00	7	3760	0	0	0	0
357	24	University graduate	25.25	1	38+	0	1	0	0	9.9	8.1	5	11	27.7	13.7	11.1	86.28	Normal	2+1	11:48:00	38.6	1	1	0	01:34:00	7	3400	1	0	0	0
358	30	University graduate	29.29	1	39+	1	0	0	0	11	9.6	39.63	10.7	22.8	9.9	7.9	160	Acute chorioamniotic disease stage III	1	09:39:00	38.2	0	3	3	01:34:00	7	3250	1	0	0	0
359	30	Master	23.88	1	40+	0	0	0	0	7.4	5.3	9.04	10.5	26	11.1	9.1	68.87	Normal	0	02:34:00	39	1	2	0	00:59:00	6	3960	1	1	3	0
360	30	Master	27.88	1	40+	0	0	0	0	7.4	4.4	14.21	11	27.1	14	11	49.89	Normal	1	16:08:00	38.7	1	0	0	00:58:00	7	2660	0	0	0	0
361	23	Trade school	28.04	1	39+	0	0	0	0	8.4	6.7	4.82	11.5	23.7	11.7	10	184.39	Acute chorioamniotic disease stage I	0	17:13:00	38.3	1	3	3	02:35:00	10	2800	0	0	0	0
362	25	University graduate	25	1	38+	0	0	0	0	17.7	16.3	26.69	11	26.4	12.3	9.7	61.32	Normal	0	03:53:00	38.4	1	0	0	00:38:00	7	3520	0	0	0	0
363	29	University graduate	19.26	1	40+	0	0	0	0	6.5	4	2.71	10.3	27.3	10.3	7	22.36	Normal	1+2	14:35:00	38	1	1	0	01:30:00	5	3460	0	0	2	0
364	29	Master	26.15	1	39+	0	0	0	0	9.3	6.9	2.71	9.1	26.3	10.3	7	22.36	Acute chorioamniotic disease stage II	0	14:56:00	38.7	0	0	0	01:06:00	9	3260	0	0	0	0
365	28	University graduate	24.25	1	39+	0	0	0	0	12.3	11.2	34.16	10.2	26.7	14.8	12.3	97.39	Normal	3	22:20:00	38.6	1	1	3	01:32:00	10	3300	0	0	0	0
366	30	University graduate	26.17	1	39+	0	0	0	0	24	22.3	3.84	11.6	21.9	15.2	12	90.72	Normal	1	15:57:00	38.5	0	3	0	01:32:00	10	3250	0	0	0	0
367	24	University graduate	26.43	1	38+	0	0	0	1	6.6	5	6.83	11.4	32.7	15.9	13.5	27.13	Normal	1	1day + 10:55:00	38.1	0	1	0	00:30:00	5	3550	0	0	0	0
368	27	University graduate	31.61	1	39+	0	0	0	0	23.1	21.9	8.63	10.2	29	22.4	19.5	159.69	Acute chorioamniotic disease stage I	0	10:13:00	39	1	3	0	01:32:00	10	3750	0	0	1	1
369	29	University graduate	27.05	1	40+	1	0	1	0	8.9	7.2	9.89	10.1	25	9.3	7.5	143.26	Normal	1	04:42:00	38.5	1	3	3	00:30:00	5	3400	0	0	0	0
370	31	University graduate	28.12	1	38+	0	0	0	0	20	17.2	29.95	10.6	28.8	16.8	14.2	106	Normal	0	03:40:00	38.7	1	1	0	02:20:00	25	3470	0	0	1	1
371	28	Master	23.3	1	35+	0	1	0	1	13.9	12.6	14.99	9.3	22.5	13.7	11.3	60.17	Normal	0	02:01:00	38.7	0	1	0	00:51:00	9	2100	1	0	1	1
372	33	University graduate	30.79	1	41+	0	0	0	0	17.5	15.7	43.39	9.5	23.8	15.9	12.2	87.62	Normal	2	16:47:00	39.2	1	1	1	01:37:00	8	3610	0	0	2	0
373	31	Master	23.62	2	38+	0	0	0	0	7.2	5.3	0.69	11.3	30.1	13.8	11.6	20.53	Acute chorioamniotic disease stage III	0	17:00:00	38.5	0	0	0	00:10:00	5	3230	0	0	4	1
374	26	Trade school	22.69	1	40+	0	0	0	0	8.3	6.3	3.47	10.2	24	12.3	9.9	51.36	Normal	0	03:57:00	38.2	1	0	2	01:57:00	8	3290	0	0	0	0
375	34	Master	24.84	1	39+	0	0	0	0	14.5	13.2	57.02	10.1	27.1	10.2	8.2	88.27	Normal	1	1day + 22:35:00	38.5	1	0	0	02:35:00	15	3300	1	0	1+2	1
376	29	University graduate	25.69	1	41+	0	0	0	0	4.7	2.9	0.89	10.8	28.3	10.1	8	138.76	Normal	3	1day + 0:02:00	38.4	1	3	0	02:35:00	15	3800	0	0	0	0
377	25	Trade school	28.56	1	40+	0	0	0	0	9.1	7.2	2.59	10.1	20.3	11.1	7.6	16.29	Normal	0	03:28:00	38.2	0	0	2	00:28:00	7	3030	0	0	0	0
378	27	University graduate	26.91	1	39+	0	0	0	0	8	5.8	2.86	9.7	24.4	11.2	8.1	49.38	Normal	0	04:28:00	38.2	0	0	0	00:38:00	7	2900	0	0	0	0
379	28	University graduate	28.24	1	38+	0	0	0	0	8	5.8	2.86	9.7	24.4	18.3	14.9	61.11	Normal	0	07:48:00	38.6	1	0	0	02:18:00	7	2660	1	0	0	0
380	27	University graduate	28.2	1	39+	0	0	1	0	15.6	14.4	20.66	10.6	26.8	10.8	9.1	152.25	Acute chorioamniotic disease stage I	1	1day + 17:50:00	38.7	1	3	3	00:38:00	7	3050	1	0	0	0
381	29	University graduate	32.09	1	40+	0	0	1	0	16.2	14.6	25.94	10.4	25.5	15	12.7	71.16	Acute chorioamniotic disease stage I	0	05:46:00	38.4	1	2	0	03:01:00	14	3530	0	0	0	0
382	31	Master	29.58	1	39+	0	0	0	0	15.5	14	22.04	10.5	23.2	16	14.7	177.32	Acute chorioamniotic disease stage III	2+3	13:02:00	39.8	0	3	0	03:01:00	14	3750	1	0	1	1
383	28	University graduate	24.24	1	39+	0	0	1	0	10.2	7.7	1.31	10.5	26.9	13.7	10.8	33.85	Normal	1	05:08:00	39.5	0	0	0	01:18:00	22	3400	1	0	0	0
384	24	University graduate	24.39	1	37+	0	0	0	0	16.6	14	11.29	11	25.1	9.7	6.6	29.24	Normal	0	00:43:00	38.1	1	0	1	00:43:00	7	3280	1	0	0	0
385	35	University graduate	24.6	1	40+	0	0	0	0	10.5	8.8	4.35	11.1	23.7	12.3	9.4	109.68	Normal	0	03:38:00	38.2	1	1	2	01:03:00	12	3200	0	0	0	0
386	31	University graduate	25.58	1	38+	0	1	0	0	7.8	5.6	1.27	10.1	28.4	13	10.3	57.79	Normal	3+1	1day + 5:10:00	38.1	1	1	0	01:55:00	10	3430	1	0	2	0
387	24	University graduate	27.23	1	40+	0	0	0	0	15.4	13.6	16.22	9.7	23.8	18.3	15.6	71.3	Normal	1	2days + 20:36:00	38.3	1	1	0	00:56:00	4	3600	0	0	0	0
388	28	Doctor	24.95	1	41+	0	0	0	0	8.6	7	0.3	11.1	23.5	16.6	14	60.11	Normal	2+1	06:11:00	38.2	1	0	0	02:41:00	19	3900	0	0	0	0
389	33	University graduate	25.5	1	40+	0	0	0	0	9	7.4	2.15	10.5	25.4	13.8	11.4	62.52	Normal	0	10:12:00	38.2	1	0	0	02:42:00	33	3550	0	0	2	0
390	30	Master	25.11	1	41+	0	0	0	0	14.6	13	13.41	11.4	27.4	14.3	11	40.43	Normal	3	01:25:00	39.7	1	0	0	01:25:00	10	3280	1	0	0	0
391	32	University graduate	25.07	1	39+	1	0	0	0	18.3	16.5	111	9.5	23.8	10.8	9.1	152.25	Acute chorioamniotic disease stage III	0	1day + 7:39:00	38.3	1	3	3	02:18:00	7	3100	1	0	1	1
392	27	University graduate	38.2	1	39+	0	1	0	0	17.8	16.2	13.15	10.1	25.3	10.6	8.8	158.99	Normal	2+1	19:22:00	38.6	0	3	0	02:18:00	7	3800	0	0	2	0
393	24	Trade school	25.07	1	39+	0	0	0	0	16.3	12.9	11	10.9	27.4	12.7	9.7	67.2	Acute chorioamniotic disease stage I	0	05:10:00	39	1	2	3	00:50:00	5	3550	1	0	0	0
394	27	Master	25.14	1	40+	0	0	0	0	11.4	9.8	20.3	11.5	30.4	8.7	6.4	24.8	Normal	0	04:03:00	38.4	0	0	0	00:50:00	5	3540	0	0	0	0
395	22	University graduate	30.44	1	39+	0	0	1	0	11.5	10	8.04	10.2	25.3	12.5	10.7	160	Acute chorioamniotic disease stage I	0	05:10:00	39	1	3	3	00:10:00	5	3700	0	0	0	0
396	28	University graduate	28.66	1	40+	0	0	0	0	17.7	16.2	12.52	10.1	24.7	13.9	12.5	151.05	Normal	3	09:37:00	38.4	1	3	2	01:57:00	8	3150	1	0	0	0
397	32	University graduate	24.8	1	39+	1	0	0	0	18.6	16.3	78.83	10.3	22.2	9.1	6.5	90.43	Acute chorioamniotic disease stage II	1	15:56:00	38.4	1	1	3	02:31:00	4	3250	0	0	0	0
398	30	University graduate	24.6	1	37+	0	0	0	0	16.5	15	4.95	11	26.7	9.8	7.8	39.45	Normal	0	03:27:00	38.1	0	1	3	01:02:00	8	3370	0	0	2	0
399	28	University graduate	28.3	1	39+	0	0	0	0	9.7	7.7	7.79	11	26.3	23	20.5	72.6	Normal	3+1	16:07:00	38.2	1	1	1	01:57:00	13	3400	1	0	2	0
400	31	University graduate	25.97	1	40+	0	0	0	0	17.3	15.8	10.19	10.9	23.2	11.9	8.7	36	Normal	0	09:02:00	38.5	0	1	0	03:02:00	3	3440	0	0	1	1
401	28	Master	26.49	1	38+	0	0	0	0	18.7	17.2	11.15	10.8	27.3	15.9	14.1	89.75	Normal	2+1	09:57:00	39.1	0	3	0	01:57:00	13	3550	0	0	4	0
402	27	University graduate	30	1	41+	0	0	0	0	12.8	11.5	9.08	10.1	25.8	18.8	17.8	160	Acute chorioamniotic disease stage I	2+1	10:10:00	39.5	0	3	0	03:02:00	3	3900	1	0	0	0
403	30	University graduate	25.27	2	38+	0	0	0	0	10	7.5	2.86	10.7	26.4	9.8	7	11.14	Normal	0	00:07:00	38.2	0	0	0	00:07:00	8	2790	0	0	0	0
404	27	University graduate	30.04	1	40+	0	0	0	0	15.8	13.4	14	9.8	27	13.8	10.8	118.02	Normal	0	1day + 4:46:00	38.7	1	3	0	03:02:00	3	3550	0	0	0	0
405	30	University graduate	29.24	1	41+	0	0	0	0	16.9	15.3	11	10.7	25.9	9.7	7.2	46	Normal	1	19:41:00	38.6	1	1	0	00:41:00	9	3400	1	0	0	0
406	33	University graduate	28.06	2	38+	1	0	0	0	11.7	10.3	25.3	10.5	26.4	13.5	10.8	49.1	Normal	0	00:16:00	38.2	0	0	0	00:16:00	9	3100	0	0	0	0
407	27	University graduate	27.39	1	38+	0	0	0	0	18.3	16.3	9.2	10.1	24.6	16.3	12	113.4	Normal	2	04:30:00	38.8	1	0	0	01:45:00	10	3230	1	0	0	0
408	23	Trade school	33.59	1	39+	1	0	0	0	16.9	15.3	11	10.7	25.9	12.3	9.7	73.1	Normal	2	1day + 0:01:00	38.1	1	0	0	00:17:00	14	3230	0	0	2	0
409	27	University graduate	27.91	1	40+	0	1	0	0	11.7	10.3	25.3	10.5	26.4	16.3	12	113.4	Acute chorioamniotic disease stage I	2	13:11:00	39	1	2	3	00:41:00	14	3620	1	0	0	0
410	28	University graduate	28.84	1	37+	0	0	0	0	18.3	16.3	9.2	10.1	24.6	12.3	9.7	73.1	Normal	0	00:49:00	38.5	1	0	0	00:49:00	9	3410	1	0	1	1
411	29	Master	29.29	1	40+	1	0	0	0	24.5	22.2	12.7	10.8	25.3	13.6	11.2	45.06	Normal	3+1	09:09:00	38.7	1	2	3	02:34:00	16	3470	0	0	2	0
412	27	University graduate	25.1	1	39+	1	0	1	0	8.9	7.2	0.51	10.7	23.5	9.4	7	26.72	Normal	1	01:43:00	38.4	0	1	0	00:33:00	7	3260	1	0	0	0
413	28	University graduate	25.97	1	40+	1	0	0	0	11.6	9.1	58.82	11.5	27	9.8	6.8	98.23	Normal	2+1	2days + 7:51:00	38.1	1	3	0	00:33:00	7	3850	1	0	0	0
414	26	University graduate	27.68	1	38+	0	0	0	0	10.3	8	19.52	11.5	26	18.3	14.6	157.84	Acute chorioamniotic disease stage I	0	10:44:00	39.2	0	1	0	02:59:00	11	3590	1	0	0	0
415	25	University graduate	30	1	40+	0	0	0	0	8.4	6.3	3.56	9.6	27.5	12.3	9.8	69.13	Normal	0	02:43:00	38.7	1	0	0	00:33:00	7	3050	0	0	1	1
416	30	Master	31.02	1	40+	0	0	0	0	18.6	16.9	22.02	10.4	27.4	16	13	53.37	Normal	1	02:36:00	38.5	1	0	0	01:51:00	9	3080	1	0	1	1
417	27	Master	27.18	1	39+	0	0	0	0	10.7	7.3	22.02	10.3	27	16.2	13.1	72.67	Normal	0	01:52:00	38.3	1	0	0	01:52:00	3	3300	1	0	0	0
418	28	University graduate	25.19	1	40+	0	0	0	0	7.6	5.2	3.91	11.2	29.2	9.6	6.7	56.49	Normal	3	12:12:00	38.5	1	1	0	01:02:00	8	3270	0	0	0	0
419	30	University graduate	26.53	1	39+	0	0	1	0	7.8	6.5	7.94	10.8	25.7	12.3	10.6	104.8	Normal	0	11:24:00	38.1	1	3	2	01:52:00	3	3600	1	0	0	0
420	27	University graduate	25.34	1	40+	0	0	0	0	12	10.7	22.02	10.6	25.7	11.1	8.3	160	Acute chorioamniotic disease stage I	1	04:20:00	39.9	1	3	1	01:02:00	8	3450	0	0	0	0
421	29	University graduate	24.97	1	40+	0	0	1	0	14.1	12.1	48.9	10.8	33.5	11	8.4	136.6	Acute chorioamniotic disease stage IV	0	09:52:00	39.5	1	2	2	01:47:00	8	3590	1	0	1	1
422	27	Trade school	30.88	1	40+	1	0	0	0	17.6	16	47.2	10.1	27.7	15.7	12.8	160	Acute chorioamniotic disease stage III	2+1	22:47:00	39.3	1	3	0	01:47:00	8	3650	1	0	0	0
423	26	University graduate	27.36	1	39+	0	0	0	0	15.5	13.9	10.4	11.1	26.3	15.4	13	65.7	Normal	2+1	01:19:00	38.9	1	0	0	01:29:00	16	3280	0	0	0	0
424	27	University graduate	27.36	1	39+	0	0	1	0	7.7	5.6	2.4	9.9	25.2	10.5	7.8	33.6	Normal	0	04:26:00	38.3	1	0	3	01:26:00	4	3710	0	0	2	0
425	26	University graduate	25.63	1	39+	0	0	0	0	7.1	5.2	18.76	12.1	31.9	14.1	11.6	160	Acute chorioamniotic disease stage I	1	2days + 20:10:00	38.5	1	3	3	00:07:00	8	3900	1	0	1	1
426	28	University graduate	28.28	1	39+	0	0	0	0	13	11.2	9.08	10.5	25.6	15.8	12.3	106.69	Acute chorioamniotic disease stage I	0	02:59:00	38.8	0	2	3	00:34:00	6	2980	1	0	0	0
427	30	University graduate	28	1	40+	1	0	0	0	18.1	16.2	77.5	9.8	25.2	10.7	8.5	137.1	Acute chorioamniotic disease stage I	2+1	1day + 8:08:00	38.7	1	3	0	00:07:00	8	3250	0	0	1	1
428	29	University graduate	29.01	1	40+	0	0	0	0	16	13.7	10.5	11.2	31.3	14.7	12.2	59.2	Acute chorioamniotic disease stage III	0	20:30:00	38.1	1	3	3	00:34:00	6	4150	0	0	0	0
429	29	University graduate	24.6	1	40+	0	0	0	0	12.1	10.4	33.8	12	27.4	11.6	9.6	88.9	Normal	0	08:40:00	38.7	1	1	3	04:25:00	5	3620	1	0	0	0
430	21	Trade school	32.02	1	39+	0	0	0	0	7.1	5.4	4	10.9	25	11.6	9.8	21.4	Normal	0	01:58:00	38.2	0	1	3	01:23:00	7	3260	0	0	0	0
431	31	Trade school	24.76	1	40+	1	0	0	0	14.7	12.5	33.8	10.1	22.8	14.9	11.8	116.5	Acute chorioamniotic disease stage II	1	02:58:00	39	0	3	3	01:23:00	7	3450	1	0	0	0
432	30	University graduate	24.76	1	39+	0	0	0	0	13.5	11.1	9.3	10.7	20.2	15.1	11.9	65.1	Normal	0	07:53:00	39.2	1	1	0	02:23:00	7	3200	1	0	0	0
433	23	University graduate	27.3	1	40+	0	0	0	0	13.4	11.8	10.6	10.8	25.8	9.2	6.6	37.2	Normal	0	07:18:00	39.4	1	1	0	01:43:00	7	3350	0	0	0	0
434	26	University graduate	27.3	1	41+	0	0	0	0	18.2	16.3	82.8	10.1	26.7	16.6	14.3	128.6	Acute chorioamniotic disease stage III	3	1day + 3:40:00	38.6	1	3	0	01:43:00	7	3580	0	0	1	1
435	28	University graduate	27.63	1	40+	0	0	0	0	19	15.8	19.2	9.9	23.5	21.9	15.2	75.6	Acute chorioamniotic disease stage III	0	10:51:00	38.5	0	1	3	01:36:00	9	3320	0	0	0	0
436	26	University graduate	30.01	1	40+	1	0	0	0	20.6	18.9	59.1	11.1	27.7	20.9	18.7	107.3	Acute chorioamniotic disease stage II	2+1	1day + 7:18:00	39	0	3	0	01:36:00	9	3600	0	0	1	1
437	28	University graduate	30.03	1	40+	0	0	0	0	10.7	8.9	11.6	9.7	27.8	10.5	8.3	92	Normal	2+1	04:18:00	38.4	1	1	0	01:53:00	7	3360	1	0	0	0
438	26	University graduate	31.26	1	39+	0	0	0	0	16.1	14.2	4.1	10.4	26.4	17.5	15.1	50.5	Normal	1	03:01:00	38.9	1	1	0	03:31:00	23	4020	0	0	0	0
439	28	University graduate	29.21	1	41+	0	0	1	0	8.9	7.4	25.7	11.6	31.6	10.1	8.5	160	Normal	1	01:19:00	38.7	0	3	2	03:31:00	23	3950	0	0	0	0
440	27	University graduate	28.5	1	39+	0	1	0	0	8.7	6.3	3.85	11.5	27.1	12.8	9.9	79	Normal	0	11:18:00	38.2	1	2	0	00:38:00	2	3190	0	0	0	0
441	32	University graduate	26.95	1	40+	0	0	0	0	7.6	6.1	2.24	10.8	25.7	11.2	9	78.55	Normal	1	01:45:00	38.6	1	1	1	01:45:00	15	3370	0	0	0	0
442	25	University graduate	24.67	1	39+	0	0	0	0	7.6	6	1.06	12.3	26.2	11.8	9	36.19	Normal	0	00:42:00	38.1	1	0	0	00:32:00	8	3210	0	0	0	0
443	31	Master	21.64	1	40+	0	0	0	0	6.7	4.9	1.73	10.5	26.6	10.7	8.4	22.85	Normal	2+1	01:27:00	38.1	1	0	0	00:32:00	18	3440	0	0	0	0
444	30	Master	27.8	1	40+	0	0	1	0	12.3	10.1	2.15	11.6	28.5	15.7	13.8	54.22	Normal	0	01:08:00	38.1	1	0	0	01:08:00	12	3280	1	0	0	0
445	31	University graduate	29.17	1	40+	1	0	0	0	21.7	19.9	51.87	11.3	27	15.2	13.8	145.01	Acute chorioamniotic disease stage III	3+1	13:24:00	38.5	1	3	0	00:32:00	18	4000	1	0	0	0
446	27	University graduate	26.04	1	39+	0	0	0	0	24.2	20.5	11.75	11	27.3	27.6	23.6	111.1	Acute chorioamniotic disease stage I	0	03:59:00	38.5	0	3	2	01:08:00	12	3700	1	0	1	1
447	30	University graduate	26.96	1	39+	0	0	0	0	13.7	12.4	20	9.4	25.7	13.5	10.8	77.98	Acute chorioamniotic disease stage III	0	13:09:00	39.1	1	0	3	02:04:00	11	3550	1	0	0	0
448	27	University graduate	24.21	1	39+	0	0	0	0	15.5	13.6	7.69	10.4	25.8	12.4	8.8	42.07	Normal	3+2+1	06:45:00	38.4	1	0	0	02:15:00	15	3350	1	0	1	1
449	29	University graduate	23.71	1	37+	0	0	0	0	8.6	6	2.54	9.4	26.8	14.4	11.6	52.09	Normal	1	23:30:00	38.1	1	0	0	01:00:00	15	3050	0	0	0	0
450	28	University graduate	26.91	1	40+	0	0	0	0	9.4	7	1.96	11	23.8	16.8	14	71.64	Normal	3	06:57:00	38.3	1	0	0	03:07:00	8	3380	0	0	2	0
451	29	University graduate	28.6	1	38+	0	0	0	0	16.4	14.6	18.43	10.9	27.5	9.4	7.6	150.03	Acute chorioamniotic disease stage I	1+2+3	15:00:00	38.5	0	3	0	00:38:00	2	3250	1	0	1	1
452	28	University graduate	26.89	1	39+	0	0	0	0	10.4	8.4	9.45	10.5	27	11.8	9.6	79.1	Normal	0	09:45:00	38.3	1	1	2	03:25:00	10	4000	0	0	0	0
453	22	University graduate	27.68	1	41+	0	0	0	0	15	13.2	38.4	10.2	20.4	11.5	9.1	73.15	Acute chorioamniotic disease stage III	3+1	05:37:00	39.1	1	1	3	01:58:00	7	3300	0	0	0	0
454	27	Master	27.21	1	39+	0	0	1	0	15	13.2	38.4	10.2	20.4	11.5	9.1	73.15	Acute chorioamniotic disease stage I	0	1day + 6:58:00	39.6	1	1	0	01:30:00	7	3340	0	0	0	0
455	27	University graduate	28.06	1	39+	0	0	0	0	9.2	6.5	6.6	9.9	27.3	13.5	9.7	41.6	Normal	1	04:56:00	38.2	1	1	0	00:53:00	7	3620	1	0	0	0
456	28	University graduate	27.63	1	40+	0	0	0	0	23.7	21.7	40.3	10.7	29.2	24.4	21.6	104	Acute chorioamniotic disease stage II	0	12:22:00	39.1	0	0	0	01:37:00	13	3900	1	0	1	1
457	26	University graduate	6	1	40+	0	0	0	0	12.7	10.8	13.5	9.9	23.5	11.2	8.6	84.3	Normal	0	05:55:00	38.8	1	1	0	01:35:00	5	3620	1	0	1	1
458	28	Master	27.91	1	40+	0	0	1	0	5.1	3.5	2.36	10.3	25	8.8	6.3	88.8	Normal	0	10:51:00	38.8	1	1	0	03:21:00	9	3420	1	0	0	0
459	33	University graduate	25.97	1	39+	0	0	0	0	11.2	9.2	42.8	9.8	23.5	14.2	11.4	42.8	Normal	0	1day + 2:26:00	38.3	1	1	2	02:49:00	9	3420	1	0	0	0
460	30	University graduate	26.6	1	38+	0	0	0	0	10	7.6	5.4	10.7	29.1	12.6	9.3	29.34	Normal	1	02:02:00	38.4	1	1	0	00:32:00	3	3520	1	0	0	0
461	35	Trade school	26.05	1	40+	0	0	0	0	15.2	14.1	24.2	9.8	27.5	11.6	10.3	125	Acute chorioamniotic disease stage I	1	06:15:00	38.8	1	3（宫内感染）	0	00:32:00	3	3450	1	0	0	0
462	36	University graduate	27.76	1	40+	0	0	0	0	14.3	11.5	17	10.8	29.3	15.7	11.9	63.25	Acute chorioamniotic disease stage I	2+1	1day + 19:36:00	38.3	1	2	3	03:56:00	9	4120	1	0	1	1
463	32	University graduate	24.38	1	38+	0	0	0	0	7.3	5	13.18	10.2	26.6	9.1	6.6	91.54	Normal	0	05:45:00	38.2	1	0	0	01:10:00	15	2640	1	0	0	0
464	29	University graduate	26.1	1	39+	0	0	0	0	11.9	10.6	4.35	9.9	22.6	9.3	7.4	57.77	Normal	0	15:36:00	39.3	1	1	0	01:56:00	4	4310	1	0	0	0
465	28	Master	23.43	1	38+	0	0	0	0	10.3	7.9	5	9.6	28.2	15.6	13.2	75.7	Normal	0	01:22:00	38.7	1	2	3	00:24:00	6	2960	1	0	0	0
466	30	University graduate	28.08	1	40+	0	0	1	0	19.1	17	12.39	10.5	26.9	15.8	12.1	98.32	Normal	1	1day + 1:56:00	38.3	1	2	3	02:56:00	9	3600	1	0	0	0
467	27	University graduate	25	1	41+	0	0	0	0	15.2	12.8	13.29	10.8	29.5	18.6	15.3	60.24	Acute chorioamniotic disease stage I	2+1	04:52:00	39.3	1	1	0	01:47:00	8	3270	0	0	2	0
468	25	Trade school	26.1	1	40+	0	0	1	0	19.6	18.4	5.29	10.6	23.1	13.2	11.3	101.72	Normal	1	08:10:00	39.1	0	1	0	01:00:00	5	3840	1	0	2	0
469	31	University graduate	33.64	1	39+	0	1	1	0	16.9	14.5	5.55	10.8	23.3	10.9	8.7	80.15	Normal	0	02:31:00	38.9	1	1	0	00:53:00	14	3260	0	0	0	0
470	28	University graduate	28.63	1	39+	0	0	0	0	11.3	9.9	49.87	10.5	26.9	10.8	8.7	80.15	Normal	0	07:42:00	40.1	1	3	3	00:53:00	14	3750	0	0	1	1
471	36	University graduate	27.76	2	39+	1	0	1	0	7.6	4.6	1.4	11	24.1	11.2	8.2	60.66	Normal	0	07:21:00	38.7	0	0	0	00:36:00	9	4120	1	0	0	0
472	28	University graduate	27.68	1	40+	0	0	0	0	7	5.1	0.5	11.1	27	14.2	11.3	27.03	Normal	0	02:47:00	38.5	1	1	3	02:47:00	8	3980	1	0	0	0
473	27	University graduate	24.73	1	40+	0	0	1	0	7.3	5.5	0.1	10.9	23.3	12.3	9.1	39.03	Normal	3+1	09:19:00	38.8	1	1	0	01:24:00	6	3630	0	0	0	0
474	25	University graduate	26.23	1	39+	0	0	1	0	19.5	17.2	0.1	11.7	24.5	16.6	12.7	1119.11	Normal	0	05:56:00	38.4	0	1	0	00:36:00	9	3160	0	0	1	1
475	26	University graduate	25.83	1	40+	0	0	0	0	20.4	18.9	18.18	10.8	22.9	17.1	14.6	45.07	Normal	3	04:17:00	38.5	1	1	0	01:17:00	13	3810	0	0	0	0
476	29	University graduate	29.66	2	41+	0	0	0	0	11.2	9.5	11.9	11.7	25.7	14.3	11.7	98.03	Normal	0	00:23:00	38.4	0	0	0	00:23:00	32	3990	1	0	0	0
477	25	University graduate	30.04	1	39+	0	1	1	0	8.4	6.1	0.9	10.7	24.9	15.7	13.1	69.73	Normal	3	04:44:00	38.4	1	0	1	02:14:00	16	3390	1	0	2	0
478	26	Trade school	29.4	1	41+	0	0	0	0	18.8	16.5	20.8	12.1	24	14.8	12.2	160	Acute chorioamniotic disease stage I	2	07:06:00	38.7	1	3	0	02:14:00	16	3670	1	0	1	1
479	27	University graduate	27.81	1	41+	0	0	0	0	10.6	8.9	28.33	11.1	24.5	12.4	9.6	67.29	Normal	2+1	2days + 3:47:00	38.1	1	0	0	00:32:00	18	3290	0	0	0	0
480	26	University graduate	23.61	1	40+	0	0	0	0	5.5	3.9	0.4	11.3	29.7	14.4	12	32.58	Normal	1	08:44:00	38.2	1	3	0	00:32:00	18	3700	1	0	0	0
481	24	University graduate	24.84	1	39+	0	0	0	0	14.3	11.9	43.35	12.4	25.6	11.4	8.3	38	Normal	0	03:50:00	38.5	1	0	0	00:45:00	5	3340	1	0	0	0
482	30	University graduate	33.16	1	39+	0	0	0	0	16.3	13.7	6.62	10.4	24	14.9	11.2	34.96	Normal	0	08:22:00	38.6	1	0	3	01:12:00	8	3260	0	0	0	0
483	26	University graduate	32.4	1	41+	0	0	0	0	13.2	10.9	2.13	9.8	25.6	12.8	10.2	55.42	Normal	3	02:56:00	38.1	0	0	2	01:46:00	9	3620	0	0	0	0
484	28	University graduate	28.44	1	38+	1	0	0	0	16.6	14.7	28.01	9.8	24.4	13	10.4	35.17	Normal	0	14:58:00	38.5	1	1	0	01:43:00	7	3610	1	0	0	0
485	29	University graduate	22.63	1	38+	0	0	0	0	14.5	12.4	3.37	10.1	25.5	15.5	12.7	27.88	Normal	0	09:57:00	38.1	0	1	0	00:27:00	18	3150	1	0	0	0
486	28	Master	23.95	1	38+	0	0	0	0	6.8	4.9	3.37	10.2	25.7	10	7.7	69.81	Normal	1	22:27:00	38.3	1	1	0	01:57:00	8	3340	1	0	0	0
487	27	University graduate	25.4	1	39+	0	0	0	0	12.6	11.2	8.91	10.2	26.5	9.9	7.5	91.98	Normal	1	21:50:00	38.8	1	3	0	01:57:00	8	2850	0	0	0	0
488	23	University graduate	29.04	1	38+	0	0	0	0	9.1	6.7	12.53	11.2	21.7	9.9	6.8	41.71	Normal	1	13:10:00	38.2	0	0	0	00:30:00	20	2850	0	0	0	0
489	33	University graduate	25.03	1	39+	0	0	0	0	18.7	16.8	12.5	9.6	23.1	14.5	12.1	66.04	Acute chorioamniotic disease stage I	3+2+1	1day + 5:53:00	38.3	0	3	0	00:30:00	20	3030	1	0	2	0
490	29	University graduate	24.06	1	39+	0	0	0	0	11.3	9.7	3.86	10.2	25.1	10.3	8	33.57	Normal	0	06:59:00	38.6	1	0	0	02:39:00	6	3280	1	0	0	0
491	29	University graduate	26.4	1	37+	0	0	0	0	17.5	15.2	3.9	11.1	24.4	13.1	10.6	45.9	Normal	0	04:46:00	38.5	1	1	0	01:16:00	9	3120	0	0	0	0
492	26	University graduate	24.98	1	38+	0	0	0	0	7.4	5.1	3.5	10.5	25.4	7.4	5.1	30.08	Normal	2	00:24:00	38.2	0	0	0	00:24:00	6	2890	0	0	0	0
493	28	University graduate	23.93	1	40+	0	0	0	0	16.3	14.4	18.22	9.9	24.9	14.4	12.2	78.23	Normal	3	18:23:00	38.7	0	3	0	00:24:00	6	3250	0	0	0	0
494	31	University graduate	21.99	1	39+	0	0	0	0	7.3	5.7	5.93	10.6	22.3	12.6	10.8	74.42	Normal	1	08:28:00	38.4	1	1	3	01:09:00	7	3460	1	0	0	0
495	26	University graduate	30.84	1	38+	0	0	0	0	8.8	7.2	23.24	10.1	25	7.3	5.8	51.31	Normal	0	04:26:00	38.2	0	1	3	01:23:00	2	3580	0	0	0	0
496	28	University graduate	30.84	1	37+	0	0	0	0	8.3	5.1	2.59	10.7	25.9	9.2	6.1	37.99	Normal	1	2days + 3:31:00	38.3	1	1	0	03:33:00	2	3050	0	0	2	0
497	29	University graduate	27.55	1	41+	0	0	0	0	15.8	14.4	63.98	10.6	25.4	12.6	10.8	166.55	Acute chorioamniotic disease stage II	2+1	15:28:00	38.6	1	3	3	03:33:00	2	3400	0	0	0	0
498	29	University graduate	26.32	1	38+	0	1	0	0	8.7	7.2	1.09	10.4	25.8	8.4	6.4	16.54	Normal	0	00:24:00	38.1	0	0	0	00:44:00	16	3470	0	0	0	0
499	30	University graduate	28.9	1	39+	0	0	0	0	13.9	12	8.4	10.4	27.7	12.9	9.8	62.56	Normal	0	14:27:00	38.6	1	1	0	03:18:00	2	3700	1	0	0	0
500	29	University graduate	27.81	1	38+	0	0	0	0	6.8	4.6	1.93	9.7	25.4	8.2	5.5	54.92	Normal	0	05:20:00	38.9	1	1	0	01:34:00	5	3360	1	0	0	0
501	27	University graduate	24.51	1	40+	0	0	0	0	8.3	6.5	1.3	10.6	25.5	12.9	10.7	69.51	Normal	0	09:46:00	38.2	1	0	0	01:06:00	14	3750	1	0	0	0
502	27	University graduate	26.56	1	39+	0	0	0	0	14.7	11.8	4.65	11	25.4	14	11.6	132.11	Acute chorioamniotic disease stage I	1	2days + 15:32:00	38.6	0	3	0	01:06:00	14	3700	0	0	0	0
503	23	University graduate	29.66	1	40+	0	0	0	0	8.6	6.1	2.16	11.6	22.2	9.8	7	35.82	Normal	1	16:44:00	38.5	1	1	0	00:44:00	11	3240	0	0	1	1
504	29	University graduate	25.39	1	41+	0	0	0	0	13.5	11.6	7.13	10.9	25.7	14.7	12.7	118.35	Acute chorioamniotic disease stage I	3	06:24:00	39.4	1	3	0	00:44:00	11	3450	0	0	0
505	31	Master	26.83	1	39+	0	0	0	0	8.1	5.9	0.76	11.9	26.4	12.4	9.4	36.54	Normal	0	16:02:00	38.5	1	0	0	01:17:00	18	3420	1	0	0	0
506	29	University graduate	28.35	1	38+	1	0	0	0	7.8	5.4	3.89	11.5	24.3	11.8	9.1	82.98	Normal	1	17:06:00	38.3	1	0	0	01:11:00	9	3380	1	0	0	0
507	25	Master	25.25	1	39+	0	0	1	0	14.5	13.1	16.73	11.1	26.2	10.4	8	49.91	Normal	1	04:43:00	38.3	1	0	0	00:43:00	7	3450	1	0	0	0
508	29	University graduate	26.83	1	39+	0	0	1	0	12.9	10.4	1.57	11.1	23.8	11	8.4	32.99	Normal	0	03:46:00	38.1	0	2	3	00:16:00	9	3130	0	0	0	0
509	28	University graduate	35.77	1	39+	1	0	0	0	8	7.4	68.87	13	24.3	5.9	5.4	88.64	Normal	1	08:30:00	38.5	0	3	0	01:11:00	9	4230	1	0	0	0
510	34	Master	23.05	1	40+	0	0	0	0	14.3	13.4	59.27	11.1	23.7	13.5	12	160	Normal	3	13:30:00	38.2	1	3	0	00:43:00	7	3750	0	0	2	0
511	28	University graduate	25.63	1	38+	1	0	1	0	10.1	7.5	4.76	9.5	25.2	12.9	10	35.9	Normal	0	07:27:00	38.4	1	1	1	02:02:00	23	2760	0	0	2	0
512	30	University graduate	27.94	1	39+	1	0	0	0	7.8	5.9	4	11.2	24.7	9.7	6.7	52.7	Normal	0	01:23:00	38.1	1	1	0	01:23:00	18	3270	1	0	0	0
513	26	University graduate	27.85	1	40+	1	0	0	0	11.1	9.4	33.9	11	29.7	7.9	5.6	47.4	Normal	3	12:55:00	38.3	1	1	0	02:02:00	23	3270	1	0	0	0
514	36	University graduate	27.7	1	40+	0	0	0	0	15.9	14.9	6.8	11.4	25.3	16.4	14.4	104.3	Normal	1	1day + 12:22:00	38.2	0	3	0	01:23:00	18	4000	0	0	0	0
515	28	University graduate	24.06	1	41+	0	0	0	0	7.7	5.9	6	10.3	25.6	13.2	10.4	110.33	Acute chorioamniotic disease stage II	1	11:23:00	38.3	1	2	0	00:33:00	7	3770	1	0	0	0
516	31	University graduate	30.45	1	41+	0	0	0	0	15.7	14.2	32.91	9.7	27.4	13.2	10.4		Normal	1	2days + 23:24:00	39.1	1	2	3	00:14:00	6	2780	1	0	1	1
517	32	University graduate	29.4	1	38+	0	0	0	0	8	6.6	4.5	11.4	27.7	12.9	10.7	65.8	Normal	3	01:30:00	38.3	1	0	0	01:00:00	5	3380	1	0	0	0
518	31	University graduate	24.15	1	37+	0	0	0	0	15.6	13.3	16.02	9.8	22.4	12.8	10.6	37.07	Acute chorioamniotic disease stage II	0	12:14:00	38.9	1	2	0	02:45:00	6	2900	1	0	0	0
519	24	University graduate	25	1	40+	0	0	0	0	18.6	16.5	76.41	10.3	27.6	14	11.2	80.25	Acute chorioamniotic disease stage II	3+1	11:57:00	38.8	1	1	3	01:15:00	5	3220	0	0	0	0
520	36	Trade school	28.44	3	39+	0	0	0	0	8.6	7.2	3.57	10.2	21.4	7.9	6	21.34	Normal	人工破膜	04:10:00	38.1	0	0	0	00:11:00	9	3380	0	0	0	0
521	36	University graduate	25.86	2	38+	1	0	0	0	10.8	9.2	0.63	11	25.2	7.4	5.6	4.53	Normal	0	00:09:00	38.1	0	0	0	00:09:00	6	3390	0	0	0	0
522	35	University graduate	21.89	1	38+	0	0	0	0	7.1	4.5	0.63	9.6	26.6	14.2	11.2	32.37	Normal	0	1day + 6:13:00	38.4	1	1	0	01:23:00	7	3100	1	0	2	0
523	26	University graduate	26.56	1	40+	0	0	0	0	9.5	8	3.46	11.4	27.1	9.7	6.9	35.65	Normal	0	00:19:00	38.1	0	1	3	00:59:00	6	2730	0	0	0	0
524	29	University graduate	28	1	41+	0	0	0	0	11.3	10.1	12.53	10.8	24.6	13.3	11	114.53	Acute chorioamniotic disease stage II	1	1day + 0:15:00	39.4	1	3	0	00:59:00	6	3900	0	0	2	0
525	25	University graduate	23.18	1	39+	0	0	1	0	10.1	7.7	1.5	9.9	21.3	15	12	32	Normal	1	15:44:00	38.1	0	0	0	01:59:00	16	3130	1	0	0	0
526	34	University graduate	25.89	1	39+	0	0	0	0	11.1	8.8	3.5	10.5	27	11.7	9.4	70.42	Normal	2+1	16:56:00	38.4	1	1	0	01:56:00	4	3450	1	1	3	0
527	26	University graduate	26.35	1	39+	0	1	0	0	22.6	21.4	55.7	10.6	26.7	12.3	9.6	108.65	Acute chorioamniotic disease stage I	0	00:18:00	38.5	1	0	3	01:08:00	2	3140	1	0	0	0
528	30	University graduate	27.34	1	40+	1	0	0	0	4.9	3.5	2.25	10.6	24.9	8	5.8	67.17	Normal	2+1	15:04:00	38.3	1	3	2	01:23:00	18	3700	0	0	2	0
529	29	University graduate	25.95	1	40+	0	0	0	0	14.3	12.2	20.19	10.8	31.5	9.9	7.6	82	Normal	1	09:29:00	38.6	1	3	0	01:59:00	16	3850	0	0	0	0
530	30	University graduate	36.71	1	41+	0	0	1	0	11.1	8.7	5.67	10.7	23	17.2	14.2	161.89	Normal		11:15:00	38.2	1	3	3	01:56:00	4	4150	0	0	0	0
531	28	University graduate	29.17	1	41+	0	0	0	0	16.8	14.4	16.66	11	25.9	16	13.9	160	Acute chorioamniotic disease stage II	2	11:19:00	38.7	0	3	3	00:16:00	9	4250	1	0	1	1
532	28	Master	24.6	1	40+	0	0	0	0	9.4	7.8	18.03	11.7	25.5	11.1	8.4	60	Normal	1	19:07:00	38.3	1	1	0	01:07:00	8	3030	0	0	7	0
533	28	University graduate	31.22	1	41+	0	0	0	0	16.3	14.4	38.4	11.4	26.4	15.5	13.4	160	Acute chorioamniotic disease stage II	2+1	09:15:00	38.3	0	3	0	01:07:00	8	3950	0	0	0	0
534	28	University graduate	23.22	1	39+	0	0	0	0	7.8	6.2	38.4	11.3	23.2	9.3	7.6	34.35	Normal	0	02:31:00	38.5	1	0	1	02:31:00	9	3520	1	0	0	0
535	30	University graduate	26.6	1	39+	0	1	0	0	12.7	11.1	20.18	11.2	25.4	11.1	9.1	133.16	Acute chorioamniotic disease stage I	3+1	02:22:00	39.3	1	3	0	02:31:00	9	2950	1	0	0	0
536	27	University graduate	24.41	1	39+	0	0	1	0	11.6	9.1	6.32	11.6	25.1	17.1	13.9	113.65	Normal	0	07:41:00	38.7	1	1	0	02:46:00	9	2990	1	0	1	1
537	34	University graduate	22.3	1	39+	0	0	0	0	7	5	0.9	10.8	23.8	10.4	7.2	81.51	Normal	0	03:45:00	38.4	1	1	0	00:55:00	10	3200	1	0	0	0
538	31	Master	28.9	1	40+	0	0	0	0	20.4	18.7	34.75	11.2	30.1	17	14.1	39.55	Acute chorioamniotic disease stage II	1	06:00:00	38.7	0	2	0	01:00:00	20	3960	1	0	0	0
539	31	University graduate	28.51	1	41+	0	0	0	1	11.7	9	5.66	11.6	24	9.7	7.5	52.47	Normal	1	01:53:00	38.3	0	1	0	01:09:00	16	3510	0	0	1	1
540	28	University graduate	26.15	1	40+	0	0	0	0	8.2	7.1	6.3	10.5	27.1	10.5	8.1	74.4	Normal	0	00:48:00	38.4	1	1	0	01:33:00	7	3490	1	0	0	0
541	25	University graduate	30.02	1	40+	0	0	0	0	14.2	12.6	2.5	10.4	26.5	12.8	10.9	118.42	Normal	0	04:28:00	38.5	1	3	2	01:08:00	2	3800	0	0	0	0
542	26	University graduate	25.93	1	41+	0	0	0	0	9	7.1	3.1	9.8	23.7	9.7	7.6	64	Normal	3	00:15:00	38.8	1	0	0	01:05:00	10	3580	0	0	0	0
543	32	University graduate	25.54	1	40+	0	0	1	0	4.9	3.6	7.15	9.9	28.5	12.6	10.5	80.82	Normal	0	06:50:00	38.5	1	1	3	03:00:00	20	3100	0	0	1	1
544	27	University graduate	24.95	1	38+	1	0	0	0	9.3	7.5	3.43	11	29.1	13.7	12.1	59.2	Normal	3+1	00:53:00	38.1	1	1	0	02:13:00	17	2370	0	0	0	0
545	29	University graduate	24.6	1	38+	0	0	0	0	15.8	14.9	26.17	11.7	29.5	16.8	14	70.51	Normal	1	18:23:00	38.5	0	0	0	02:21:00	4	3350	0	0	1	1
546	28	University graduate	24.43	1	38+	0	0	1	0	13	11.6	13.4	10.3	24.4	13.4	11.5	160	Normal	0	05:32:00	39.2	1	3	3	00:59:00	6	3100	0	0	0	0
547	37	Master	27.53	1	39+	1	0	1	0	9.8	8.7	49	10.9	25	10.3	8.7	160	Acute chorioamniotic disease stage III	3+1+2	12:10:00	38.9	0	3	3	02:21:00	4	3500	1	1	3	0
548	27	University graduate	26.95	1	38+	0	0	0	0	7.5	6.2	4.31	10.4	27	11.1	9.2	26.15	Normal	3	15:58:00	38.1	0	0	0	00:46:00	7	2710	0	0	0	0
549	28	University graduate	27.34	1	40+	0	0	0	0	10.1	7.7	3.54	9.9	23.5	17.5	14.3	83.14	Normal	1	06:42:00	38.3	1	0	0	01:52:00	8	3700	1	0	0	0
550	30	University graduate	27.1	1	40+	1	0	0	0	8.1	5.7	0.85	9.9	22.3	8.9	7	51	Normal	2+1	14:30:00	38.4	1	0	0	01:15:00	5	3570	1	0	0	0
551	25	University graduate	23.79	1	40+	0	0	0	0	7.1	5.3	2.74	10.6	28.2	12.7	10.5	47.15	Normal	3	07:08:00	38.4	1	0	0	00:28:00	7	3000	0	0	0	0
552	32	University graduate	16.37	1	40+	0	0	0	0	13.4	11.4	2.91	9.9	23.7	12.2	9.3	47.72	Normal	1	00:39:00	38.4	1	0	1	00:39:00	11	3170	0	0	0	0
553	28	University graduate	26.29	1	38+	0	0	0	0	9.3	6.7	5.83	9.9	25.3	16.1	13.4	70.44	Normal	0	03:11:00	38.4	1	3	3	00:28:00	7	3600	0	0	0	0
554	29	Trade school	27.28	1	39+	0	0	0	0	16	13.8	14.2	10.5	24.8	16.3	14.5	160	Normal	0	13:05:00	38	1	3	0	00:39:00	11	3500	0	0	0	0
555	28	Master	25.1	1	40+	0	0	1	0	10.9	9.3	12.5	9.5	25	8.2	6.7	20.8	Normal	0	03:58:00	38.4	0	1	0	00:38:00	12	3620	0	0	0	0
556	34	University graduate	30.75	1	37+	0	0	1	0	18.6	16.9	16.4	10.5	28.4	10.4	8.1	79.9	Normal	1	1day + 14:28:00	38.8	1	0	0	00:38:00	12	3620	0	0	0	0
557	28	University graduate	26.49	1	38+	0	0	0	0	13.7	12.3	45.9	11.8	32.9	9.9	8.1	68.1	Acute chorioamniotic disease stage I	0	07:58:00	38.7	1	1	3	01:49:00	11	3480	1	1	3	0
558	32	University graduate	28.92	1	40+	0	0	0	0	11.2	9.3	14	9.8	20	9.9	7.3	74.7	Normal	0	00:02:00	38.3	1	0	0	00:12:00	8	3330	0	0	0	0
559	28	University graduate	29.76	1	40+	0	0	0	0	20.1	18.4	19.3	10.3	24.4	16.3	14	160	Acute chorioamniotic disease stage II	2	08:58:00	38.5	1	3	0	01:49:00	11	3900	1	0	0	0
560	31	Master	27.96	1	39+	0	0	1	0	10.6	9	2.9	10.2	23.8	8.9	6.6	96.8	Acute chorioamniotic disease stage II	0	13:28:00	38.7	1	3	2	00:12:00	8	3550	1	0	0	0
561	28	University graduate	24.21	1	41+	0	0	0	0	7.6	5.7	2.58	10.1	28.4	9	6.7	67.1	Normal	2	17:49:00	38.8	1	2	0	03:04:00	6	3420	0	0	1	1
562	28	University graduate	25.78	1	39+	0	0	0	0	11.9	9.4	8.9	10.5	26.9	10.3	7.6	37.1	Normal	1	03:16:00	38.6	1	1	0	00:33:00	7	3280	1	0	0	0
563	28	University graduate	23.42	1	39+	1	0	1	0	20	18.5	18.9	10.5	24.4	10.8	8.7	28.6	Normal	0	1day + 3:29:00	38.6	1	0	0	01:00:00	6	2880	1	0	0	0
564	29	University graduate	28.93	1	41+	0	0	0	0	10.9	9.3	2.8	10.4	25.6	9.8	7.5	10.8	Normal	1	1day + 16:55:00	39	1	1	2	04:15:00	5	3770	0	0	0	0
565	32	University graduate	25.4	2	40+	0	0	0	0	6.6	4.1	2.83	10.7	24.7	7.8	4.4	9.84	Normal	1	16:09:00	38.2	0	0	0	00:09:00	6	3420	1	0	0	0
566	29	University graduate	26.61	1	40+	0	0	0	0	18.5	17.2	30.83	9.5	24	17.8	15.3	82.26	Acute chorioamniotic disease stage I	3+1	11:24:00	39.7	1	1	0	01:04:00	11	3080	0	0	0	0
567	28	University graduate	25.8	1	40+	0	0	0	0	21.7	18.9	12.91	9.9	25.3	16.7	13.2	64.93	Normal	0	02:59:00	38.4	1	1	2	01:24:00	6	3790	1	0	0	0
568	29	University graduate	26.07	1	38+	0	0	0	0	16.4	13.5	16.48	10.5	25.3	13.7	10.6	29.69	Normal	3	1day + 11:46:00	38.7	0	0	0	00:46:00	9	3750	0	0	0	0
